1 **Spatio-temporal Control of ERK Pulse Frequency Coordinates Fate Decisions**  
2 **during Mammary Acinar Morphogenesis**

3

4 Pascal Ender <sup>1,2</sup>, Paolo Armando Gagliardi <sup>1</sup>, Maciej Dobrzyński <sup>1</sup>, Agne Frismantiene  
5 <sup>1</sup>, Coralie Dessauges <sup>1</sup>, Thomas Höhener <sup>1</sup>, Marc-Antoine Jacques <sup>1,3</sup>, Andrew R.  
6 Cohen <sup>4</sup>, and Olivier Pertz <sup>1\*</sup>

7 1 Institute of Cell Biology, University of Bern, Baltzerstrasse 4, 3012 Bern, Switzerland

8 2 present address: Department of Autonomous Matter, AMOLF, Science Park 104,  
9 1098 XG Amsterdam, The Netherlands

10 3 present addresses: Cancer Research UK Cambridge Institute, University of  
11 Cambridge, Li Ka Shing Centre, Robinson Way, Cambridge, CB2 0RE, United  
12 Kingdom; and, Wellcome Genome Campus, Hinxton, Cambridgeshire, CB10 1SD,  
13 United Kingdom

14 4 Department of Electrical and Computer Engineering, Drexel University, 3120-40  
15 Market Street, Suite 313, Philadelphia, PA 19104, USA

16 \*Correspondence and requests for materials should be addressed to O.P. (email:  
17 [olivier.pertz@unibe.ch](mailto:olivier.pertz@unibe.ch)).

18 **Abstract**

19 The signaling events controlling proliferation, survival, and apoptosis during mammary  
20 epithelial acinar morphogenesis remain poorly characterized. By imaging single-cell  
21 ERK activity dynamics in MCF10A acini, we find that these fates depend on the  
22 average frequency of non-periodic ERK pulses. High pulse frequency is observed  
23 during initial acinus growth, correlating with rapid cell motility. Subsequent decrease  
24 in motility correlates with lower ERK pulse frequency and quiescence. Later, during  
25 lumen formation, coordinated ERK waves emerge across multiple cells of an acinus,  
26 correlating with high and low ERK pulse frequency in outer surviving and inner dying  
27 cells respectively. Optogenetic entrainment of ERK pulses causally connects high  
28 ERK pulse frequency with inner cell survival. Acini harboring the PIK3CA H1047R  
29 mutation, commonly observed in breast cancer, display increased ERK pulse  
30 frequency, inner cell survival and loss of lumen formation. Thus, fate decisions during  
31 acinar morphogenesis are fine-tuned by different spatio-temporal coordination  
32 modalities of ERK pulse frequency.

### 33 **Introduction**

34 Mammary organogenesis involves formation of a rudimentary gland during  
35 embryogenesis, followed by proliferation and branching invasion led by multi-layered  
36 terminal end buds (TEBs) during puberty. Cells in the inner TEB layers then undergo  
37 apoptosis to form the ductal lumen. During pregnancy, secretory alveoli are then  
38 formed at the ends of the ductal tree (Inman et al., 2015; Paine and Lewis, 2017).  
39 Morphogenesis of this complex structure requires spatial and temporal control of cell  
40 fates such as proliferation, survival, migration and death. However, the spatio-  
41 temporal signaling events that regulate such fate decisions remain poorly explored.  
42 The epidermal growth factor (EGF) receptor (EGFR) – mitogen activated protein  
43 kinase (MAPK) signaling cascade, that ultimately leads to activation of the extracellular  
44 regulated kinase (ERK) is a key pathway involved in mammary gland development.  
45 EGFR-ERK signaling results in the upregulation of gene products involved in a wide  
46 variety of processes such as proliferation, survival, migration and differentiation  
47 (Lavoie et al., 2020). EGFR activity is required for mammary gland morphogenesis in  
48 mice (Sebastian et al., 1998). Paracrine amphiregulin release by the matrix metallo-  
49 protease (MMP) ADAM-17 and its binding to EGFR mediates the effects of estrogen  
50 receptor  $\alpha$  to promote mammary gland development and growth (Ciarloni et al., 2007;  
51 Sternlicht et al., 2005). EGFR-dependent ERK activity is enriched at the front of  
52 elongating tubes and coordinates cell migration (Huebner et al., 2016). In 3D  
53 mammary acini, oncogenic ERK activation suppresses apoptosis and thus lumen  
54 formation (Reginato et al., 2005). In primary mammary cell culture, ERK activity is  
55 also crucial for survival (Finlay et al., 2000).

56 Recent single-cell measurements of ERK activity dynamics in a variety of 2D epithelial  
57 monolayer cultures have revealed the existence of non-periodic ERK pulses of  
58 constant amplitude and duration (Aikin et al., 2020; Albeck et al., 2013; Aoki et al.,  
59 2013; Gagliardi et al., 2021; Goglia et al., 2020; Hino et al., 2020; Hiratsuka et al.,  
60 2015). These ERK pulses originate from MAPK network properties such as  
61 ultrasensitivity (leading to steep ERK activation at a threshold EGFR input), and  
62 negative feedback (leading to ERK adaptation) (Kholodenko et al., 2010; Sparta et al.,  
63 2015). An emerging theme is that the average frequency of these non-periodic ERK  
64 pulses, referred to as ERK frequency from now on, control apoptosis (low frequency),  
65 survival (medium frequency) or proliferation (high frequency) (Albeck et al., 2013; Aoki  
66 et al., 2013; Gagliardi et al., 2021). These ERK pulses can either exhibit a stochastic

67 spatially uncorrelated behavior (Albeck et al., 2013; Goglia et al., 2020), or can be  
68 organized as wave patterns that regulate collective cell migration in a wound (Aoki et  
69 al., 2017; Hino et al., 2020; Hiratsuka et al., 2015), cell survival around sites of  
70 apoptotic cell extrusion (Gagliardi et al., 2021; Valon et al., 2021), or extrusion of  
71 cancer cells (Aikin et al., 2020). These ERK signaling patterns consist of trigger waves  
72 that involve sequential activation of ERK pulses in adjacent epithelial cells through  
73 paracrine signaling involving MMP-mediated cleavage of pro-EGF ligands.

74 In this work, we explore single cell ERK dynamics in 3D mammary acini. Culturing  
75 mammary MCF10A cells in a basement membrane matrix (Matrigel) produces acini  
76 that retain key features of in vivo breast alveoli. Based on previous work (Anderson et  
77 al., 2010; Debnath et al., 2003), we subdivided this process into four stages as  
78 depicted in Figure S1A. Stage 1 is characterized by high proliferation rates and  
79 basement membrane deposition; stage 2 consists of a quiescent state and presence  
80 of an outer cell layer with clear basolateral polarity; stage 3 consists of apoptosis of  
81 inner cells that allows formation of a hollow lumen in stage 4. The whole process takes  
82 approximately two weeks.

83 We document different spatio-temporal modalities of ERK signaling during different  
84 developmental stages of MCF10A acini formation. Stage 1 is characterized by high  
85 ERK frequency, robust proliferation and rapid collective motility. This is followed by a  
86 transition to lower ERK frequency and slower collective motility. During stage 2,  
87 formation of ERK wave patterns correlates with domains of different ERK frequencies:  
88 outer/inner cells display medium/low ERK frequencies, respectively controlling  
89 survival and apoptosis. Optogenetic control of ERK signaling shows that ERK pulses  
90 control collective migration during stage 1, and that a critical ERK frequency is  
91 necessary for survival during stage 2. We characterize a crosstalk between phospho-  
92 inositide-3 kinase (PI3K) and MAPK/ERK signaling that feeds into the regulation of  
93 ERK frequency. This provides insight into how oncogenic PI3K signaling crosstalks  
94 with ERK to contribute to loss of lumen formation. Our work reveals how spatio-  
95 temporal control of ERK frequency organizes mammary acinar morphogenesis.

## 96 **Results**

### 97 **Stage 1 proliferative acini exhibit non-periodic MMP/EGFR-dependent ERK pulses** 98 **whose frequency correlates with collective cell migration speed.**

99 To explore single-cell ERK dynamics during acinar morphogenesis, we created  
100 MCF10A reporter lines expressing the nuclear marker histone 2B (H2B) fused to  
101 miRFP703 with either the ERK activity biosensor ERK-KTR fused to mTurquoise2, or  
102 a mCherry-geminin S/G2/M cell cycle marker (Sakaue-Sawano et al., 2017). ERK-  
103 KTR reports on ERK activity through reversible nucleus/cytosol shuttling after its  
104 phosphorylation by active ERK (Regot et al., 2014) (Figure 1A). These lines were then  
105 used to grow acini according to a modified version of a previously described protocol  
106 (Debnath et al., 2003). After three days, in which EGF, serum and insulin were required  
107 for initial acinar growth, these growth factors (GFs) were removed to study ERK  
108 signaling dynamics intrinsic to acinar morphogenesis. Using the geminin marker and  
109 a fluorogenic caspase substrate, we evaluated if our protocol recapitulated the  
110 proliferation, quiescence and apoptosis fates previously documented during acinar  
111 morphogenesis (Figure S1B-E) (Debnath et al., 2002; Liu et al., 2012). Stage 1 acini  
112 (4 days post-seeding) displayed elevated levels of proliferation and absence of  
113 apoptosis. Stage 2 and 3 acini (7 and 11 days post-seeding) revealed quiescent cells  
114 and increased apoptosis leading to lumen formation. Stage 4 acini (14 days post-  
115 seeding) exhibited a mature lumen, abundant apoptotic debris, and a small increase  
116 in proliferation.

117 We then imaged single-cell ERK dynamics in stage 1 acini using confocal spinning  
118 disk microscopy of both the H2B and ERK-KTR channels with time resolutions of 3 -  
119 5 minutes, until acini started to suffer from phototoxicity (observed after 10 - 23 hours).  
120 Cells in stage 1 acini displayed asynchronous, non-periodic ERK pulses (Figure 1B)  
121 as observed in 2D culture (Aikin et al., 2020; Albeck et al., 2013; Gagliardi et al., 2021).  
122 To extract single-cell ERK activity trajectories, we used a customized version of the  
123 open-source LEVERJS software (Wait et al., 2014; Winter et al., 2016) that segments  
124 and tracks nuclei based on H2B signal; and calculates ERK activity as a ratio of ERK-  
125 KTR fluorescence intensities in cytosolic and nuclear voxel masks (Figure 1C).  
126 Detrending of the ERK trajectories and normalization of the values to [0,1] generated  
127 a reliable input for automated detection of ERK pulses (Figure 1C). Single cell ERK  
128 trajectories revealed spontaneous ERK pulses with slightly different amplitudes  
129 (Figure 1D). Trametinib-mediated MEK, gefitinib-mediated EGFR, as well as

130 Batimastat-mediated MMP inhibition abolished ERK pulses (Figure 1E). MEK or EGFR  
131 inhibition for multiple days led to massive cell death and disintegration of the acini  
132 (Figure S2A), suggesting that ERK provides a pro-survival signal. Acute stimulation  
133 with 1 ng/ml EGF induced ERK pulses of amplitudes similar to those of spontaneous  
134 pulses, while 100 ng/ml EGF induced ERK pulses of higher amplitudes (Figure 1F,G).  
135 These results document spontaneous, asynchronous EGFR- and MMP-dependent  
136 ERK pulses in stage 1 acini.

137 As previously described (Wang et al., 2013), stage 1 acini displayed collective cell  
138 motility correlating with a rotational movement of 360 degrees of whole acini over  
139 multiple hours. Later during stage 1, we observed a transition to a state of slower  
140 motility (Figure 2A, Movie S1). This was shown to correlate with deposition of  
141 basement membrane around the acinus (Wang et al., 2013). The reduction in  
142 migration speed correlated with decreased ERK frequency (Figure 2B-D and S3A,  
143 Movie S2), without having a significant effect on ERK pulse amplitude and duration  
144 (Figure S3B,C).

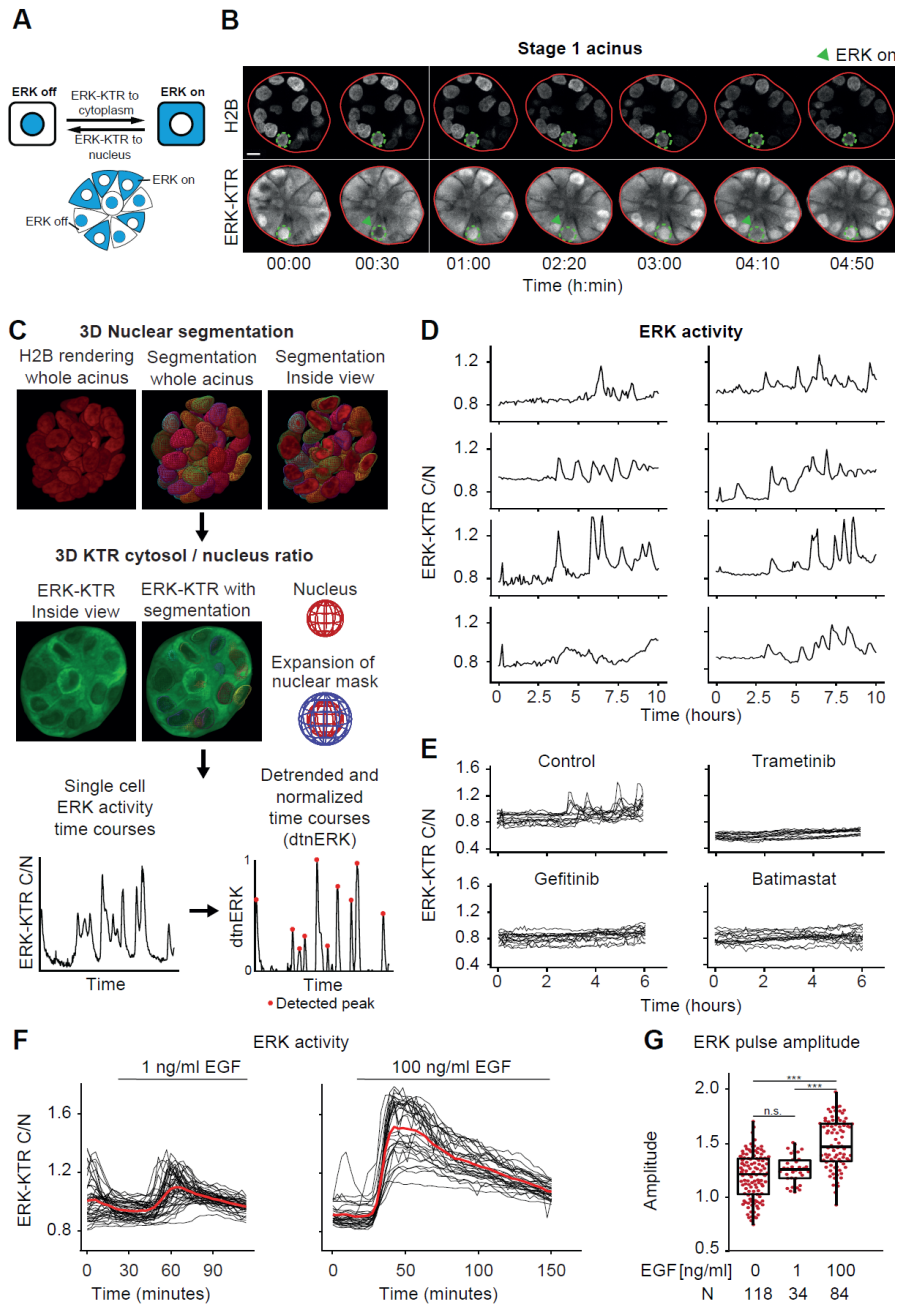

145 **Figure 1 Spontaneous EGFR/MMP-dependent ERK pulses in acini.** (A) Schematic  
 146 representation of the ERK activity - dependent subcellular localization of ERK-KTR. (B) Time-  
 147 series of the equatorial optical section of an acinus (red plain line) expressing fluorescent H2B  
 148 and ERK-KTR. Highlighted is a cell (green dotted line) that displays spontaneous ERK activity  
 149 pulses (arrowheads) resulting in the nuclear to cytoplasmic translocation of ERK-KTR. Scale  
 150 bar = 10  $\mu$ m. (C) Image analysis pipeline to extract ERK trajectories from 3D time lapse  
 151 datasets. Nuclei are segmented and tracked by LEVERJS based on the H2B signal. Single-  
 152 cell ERK activity levels are the ratio of the median ERK-KTR signal pixel intensities in the voxel  
 153 mask around the nucleus and the one of the segmented nuclear volume. ERK pulses are  
 154 detected on detrended ERK trajectories normalized to [0,1]. (D) Representative single-cell  
 155 ERK trajectories from one acinus. (E) Overlaid ERK trajectories from control and drug-  
 156 treated acini. Control trajectories correspond to the same acinus as in (D). (F) ERK trajectories  
 157 from acini treated with 1 or 100 ng/ml EGF at the indicated time points. (G) ERK pulse  
 158 amplitudes in cells from control and EGF-treated acini. Wilcoxon tests (n.s.,  $P > 0.05$ ; \*\*\*,  $P$   
 159  $< 0.001$ ).



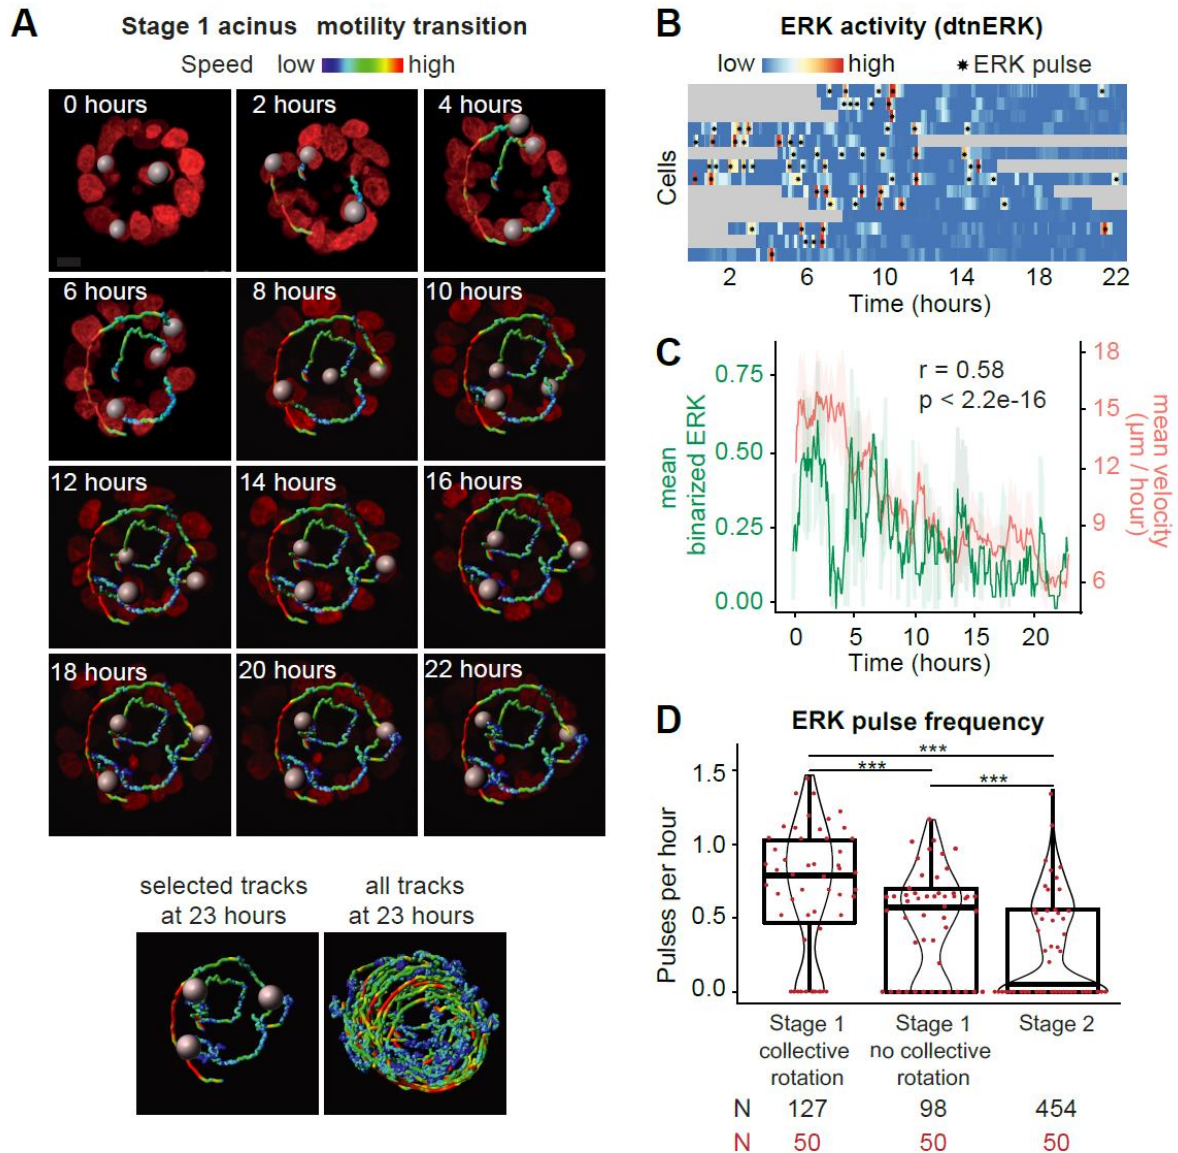

160 Figure 2 **Collective cell migration and ERK pulsing in stage 1 acini** (A) Time series  
161 renderings of the cross section of an acinus transitioning from the rapid motility to the slow  
162 motility stage. Nuclei and motility tracks color-coded by instantaneous velocity are shown.  
163 Scale bar = 10 μm. (B) Analysis of ERK activity in the acinus from (A). Heatmap shows  
164 detrended and normalized single cell ERK activity levels over time. Gray areas correspond to  
165 time points when a cell was not within the imaged volume. Asterisks indicate individual ERK  
166 pulses. (C) Analysis of motility and ERK activity in the acinus from (A). Graph shows mean  
167 binarized ERK activity and mean instantaneous velocity with 95% confidence intervals of all  
168 imaged cells over time and their Pearson correlation coefficient. Mean binarized ERK activity  
169 is used as a measure for the fraction of the cell population in a state of active ERK. (D) ERK  
170 pulse frequency from trajectories at different developmental timepoints. Trajectories pooled  
171 from 7 (stage 1 rotation), 5 (stage 1 no rotation) and 11 (stage 2) acini. Wilcoxon tests (\*\*\*,  $P$   
172  $< 0.001$ ).



173 **Stage 2 quiescent acini exhibit different ERK frequencies in inner and outer**  
174 **cells, which emerges from collective waves of ERK pulses.**

175 We then evaluated ERK dynamics in larger, stage 2 quiescent acini that are  
176 characterized by an outer layer of polarized cells, and a less organized inner cell mass  
177 destined for apoptosis for future lumen formation (Debnath et al., 2002). When  
178 comparing low-motility stage 1 and stage 2 acini, we observed a further reduction in  
179 median ERK frequency (Figure 2D), while ERK pulse amplitudes and durations  
180 remained almost identical (Figure S3B,C). This change in ERK frequency resulted  
181 from a bimodal distribution in which a part of the cell population did not display any  
182 ERK pulses (Figure 2D). Because ERK pulse frequency can regulate proliferation,  
183 survival and apoptosis fates in MCF10A cells (Aikin et al., 2020; Albeck et al., 2013;  
184 Gagliardi et al., 2021), and because inner cells in stage 2 acini are destined to undergo  
185 apoptosis, we evaluated ERK pulse frequencies in inner versus outer cells. Outer cells  
186 exhibited a significantly higher ERK frequency than inner cells, with the latter often not  
187 exhibiting ERK pulses at all (Figure 3A,B). Similar ERK activity amplitude and duration  
188 were found in inner/outer cells (Figure S3D,E). Together with our characterization of  
189 fate decisions (Figure S1), these results suggest a spatio-temporal mechanism that  
190 controls survival versus apoptosis fates through regulation of ERK frequency.

191 A striking feature of stage 2 acini was that they exhibited spatially correlated ERK  
192 pulses in the form of waves spreading across multiple cells (Figure 3B,C, Movie S3).  
193 We devised computational methods (Figure S3F-H, Materials and Methods) to detect,  
194 track, and extract features that describe ERK waves. These ERK waves were  
195 observed in all of the stage 2 acini that we imaged (N=11), and exhibited different  
196 geometries (Figure 3D). While some ERK pulses remained restricted to single cells,  
197 most of the ERK pulses occurred within collective waves (Figure 3E). ERK waves  
198 typically involved a median of 6 cells for a median duration of 54 minutes (Figure  
199 3F,G). However, a large variance was observed with some ERK waves involving as  
200 little as 2 and as many as 39 cells (almost the whole acinus). ERK waves, as well as  
201 isolated ERK pulses, were predominantly initiated in the outer cell layer (Figure 3H).  
202 Further, ERK waves that originated in the outer layer displayed a higher bias to remain  
203 at that location than those originating in inner cells (Figure 3I). We have previously  
204 shown that in 2D MCF10A cultures, as well as in acini, apoptotic cells trigger ERK  
205 waves in their neighboring cells (Gagliardi et al., 2021). However, the ERK waves we

206 observed here only rarely coincided with apoptotic events, suggesting that they  
207 originate through a different mechanism. Our results strongly suggest that ERK waves  
208 contribute to spatially position different ERK pulse frequencies in inner and outer  
209 acinar cells.

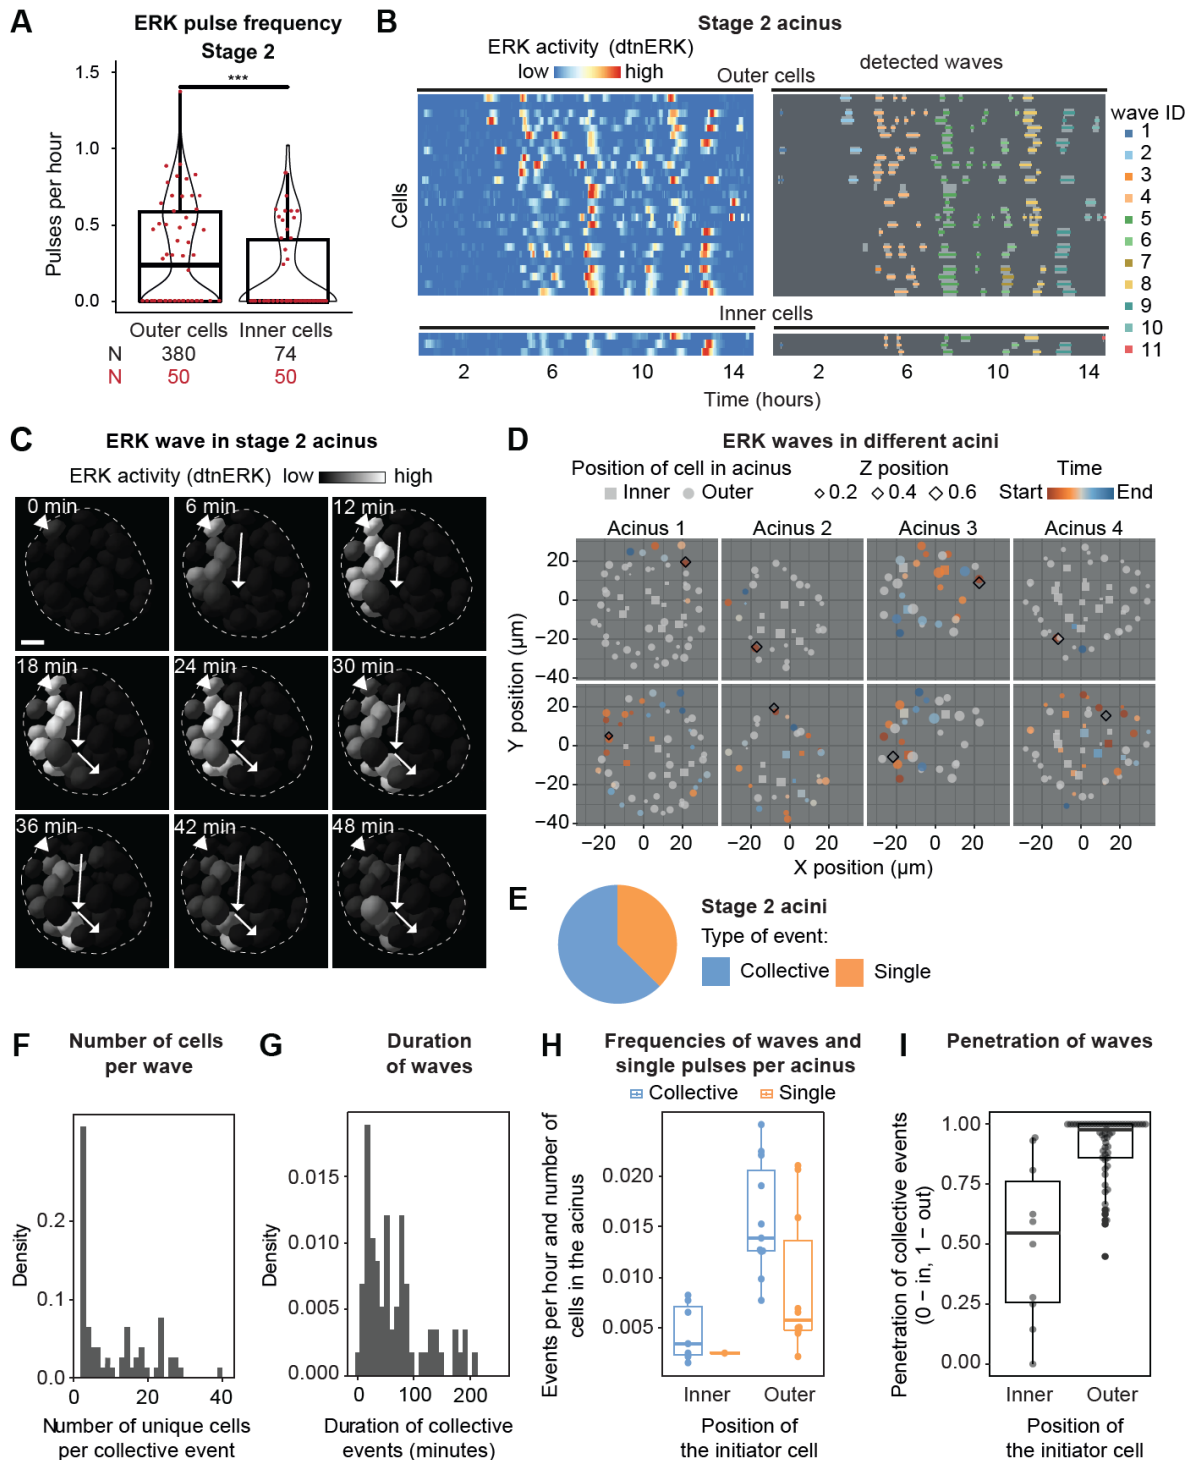

210 **Figure 3 Different ERK pulse frequencies in inner and outer acinar cell layers in stage**  
 211 **2, and collective waves of ERK pulses.** (A) ERK pulse frequency from trajectories of cells  
 212 located in inner versus outer acini layers. Trajectories pooled from 11 acini. Wilcoxon test (\*\*\*,  
 213  $P < 0.001$ ). (B) Left: heatmap of detrended/normalized single-cell ERK trajectories in outer  
 214 and inner cells of a representative acinus. Right: detection of individual ERK activity waves in  
 215 the same acinus. (C) Representative time-series micrographs of ERK wave ID 10 in (B). Nuclei  
 216 color-coded by ERK-KTR ratios. Arrows depict wave directionality. The arrowhead indicates  
 217 the initiator cell. Dashed line indicates the acinus border. Scale bar = 10  $\mu\text{m}$ . (D) 2D projection  
 218 representations of isolated ERK waves from four different acini. Cells that participate in the  
 219 wave are color-coded by their relative time of activation. Size represents the relative Z position  
 220 of the cell and shape if they belong to the inner or outer cell population. Top and bottom panels

221 depict two isolated ERK waves for each acinus. (E) Percentage of initiator events that remain  
222 restricted to a single cell vs those that lead to collective events. (F) Total numbers of unique  
223 cells involved in individual collective events. (G) Durations of individual collective events. (H)  
224 Average frequency of single and collective events per acinus, normalized by the number of  
225 cells in the acinus. (I) Penetration of collective events across acini. Calculated as the time-  
226 averaged fraction of localization of a collective event between the inner (0) and outer (1) cell  
227 layer.

## 228 **Optogenetic control of ERK frequency regulates collective motility, survival and** 229 **apoptosis fates**

230 To explore the role of ERK pulse frequency during stage 1 collective motility, as well  
231 as stage 2 apoptosis and survival fates required for lumen morphogenesis, we used  
232 two optogenetic actuators to evoke different ERK pulse frequencies in acini (Figure  
233 4A). Optogenetic fibroblast growth factor receptor (optoFGFR) is a Cry2-based light-  
234 activatable receptor tyrosine kinase that activates ERK, Akt and calcium signaling (Kim  
235 et al., 2014). OptoRaf is a CIBN/Cry2-based system in which a catalytic Raf domain is  
236 recruited to a plasma membrane targeted anchor in a light-dependent fashion to  
237 specifically activate ERK (Aoki et al., 2017). We generated stable lines expressing any  
238 of the two optogenetic constructs, a spectrally compatible ERK-KTR-mRuby, and H2B-  
239 miRFP. Application of a single blue light pulse evoked a discrete optoFGFR- or  
240 optoRaf-mediated ERK pulse with similar shape and duration as spontaneous ones  
241 (Figure 4B).

242 Since ERK pulse wave patterns can coordinate collective cell migration through  
243 regulation of myosin activity (Aoki et al., 2017; Hino et al., 2020), we hypothesized that  
244 the asynchronous ERK pulses we observed might coordinate the collective motility  
245 pattern in stage 1 acini. We therefore sought to disrupt this process by synchronizing  
246 ERK pulses across all the cells of an acinus. We imaged rotating stage 1 acini for 4  
247 hours in the absence of blue light, and observed asynchronous ERK pulses (Figure  
248 4C). We then applied high frequency light pulses at 30 minute intervals, which  
249 synchronized ERK pulses across cells (Figure 4C, Movie S4). This switch to  
250 synchronous high-frequency ERK pulsing in all cells immediately resulted in  
251 decreased cell migration speed and persistence (Figure 4D-F). This suggest that the  
252 asynchronous high frequency ERK pulses organize collective cell migration in stage 1  
253 acini.

254 Next, we tested the hypothesis that the different ERK frequencies observed between  
255 outer and inner cells in stage 2 acini regulate survival vs apoptosis cell fates. Using  
256 optoFGFR and optoRaf, we evoked frequency-modulated, population-synchronous  
257 ERK dynamics in all the cells of an acinus (Figure 5A, Movie S5). Endogenous  
258 collective ERK pulses were however still occurring. Because the regulation of  
259 apoptosis/survival fates required for lumen formation spans over one week, we could  
260 not use our live cell imaging platform to study this process. We therefore used LITOS  
261 (LED Illumination Tool for Optogenetic Stimulation) (Höhener et al., 2022) to evoke

262 frequency-modulated ERK pulse regimes in multiwell plates in a tissue culture  
263 incubator (Figure S4A). This system evoked similar ERK pulses as observed in our  
264 live cell imaging system (Figure S4B). We then stimulated stage 2 acini with light  
265 pulses delivered at different frequencies for 7 days and scored the distribution of acini  
266 that exhibited filled lumen, partially cleared lumen or cleared lumen (Figure 5B). Using  
267 both optoFGFR and optoRaf, we observed that ERK pulses induced every 0.5, 1, 2,  
268 3, 4 but not 10 hours led to survival of inner cells, increasing the number of acini with  
269 filled or partially cleared lumina (Figure 5C). These results further suggest that survival  
270 and apoptosis fates are regulated by a frequency encoded ERK signal. The optoRaf  
271 experiments indicate that high frequency ERK pulsing alone is sufficient to induce  
272 survival independently of PI3K/Akt signaling.

273 Because endogenous ERK pulses occur on top of optogenetically-induced ones, we  
274 used optoFGFR to evoke different ERK pulse frequencies in EGFR-inhibited acini that  
275 do not exhibit spontaneous ERK pulses. Here, unstimulated acini and those stimulated  
276 every 10 hours displayed cell death. In marked contrast, ERK pulses applied at 0.5, 1,  
277 2, 3 or 4 hours led to cell survival (Figure 5D). These results show that cells in acini  
278 must experience at least one ERK pulse every 4 hours to survive.



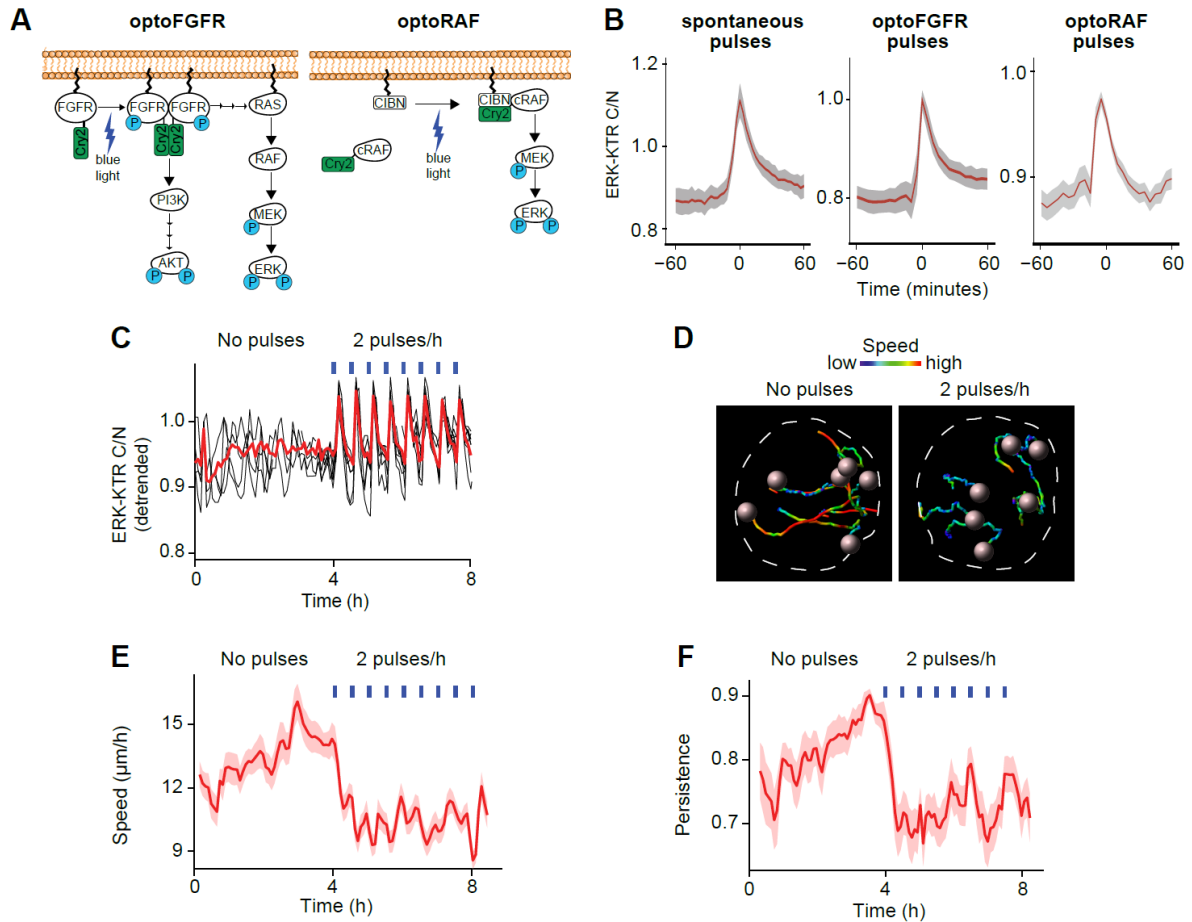

279 **Figure 4 Optogenetic stimulation of acini controls 3D migration properties in stage 1**  
 280 **acini** (A) Cartoon of the optoFGFR and optoRAF systems. OptoFGFR consists of the  
 281 intracellular domain of FGFR1 linked to the plasma membrane and a Cry2 PHR domain which  
 282 dimerizes upon blue light stimulation, leading to receptor autophosphorylation and activation  
 283 of downstream cascades. OptoRAF consists of a Cry2 linked to cRaf and a membrane-linked  
 284 CIBN domain. CIBN and Cry2 dimerize upon blue light stimulation which recruits cRaf to the  
 285 plasma membrane where it phosphorylates MEK. (B) Average ERK trajectories from isolated  
 286 spontaneous and optogenetically induced ERK pulses with 95% confidence interval. Time = 0  
 287 corresponds to maximal amplitude of peaks. (C) Overlaid detrended ERK activity trajectories  
 288 from a stage 1 rotating acinus expressing optoFGFR and stimulated every 30 min starting  
 289 from 4 hours. Vertical blue lines indicate the blue light stimulation. (D) Six single-cell migration  
 290 trajectories from the same example organoid color coded according to migration speed.  
 291 Spheres represent the nuclei positions at the end of the trajectory. The micrographs were  
 292 taken at 4 and 8 hours of the experiment, each one with the migration trajectories of the past  
 293 4 hours. Dashed line indicates the acinar border. (E) Speed and (F) persistence of single-cell  
 294 migration in the same acinus. Population average and 90% confidence interval are shown.

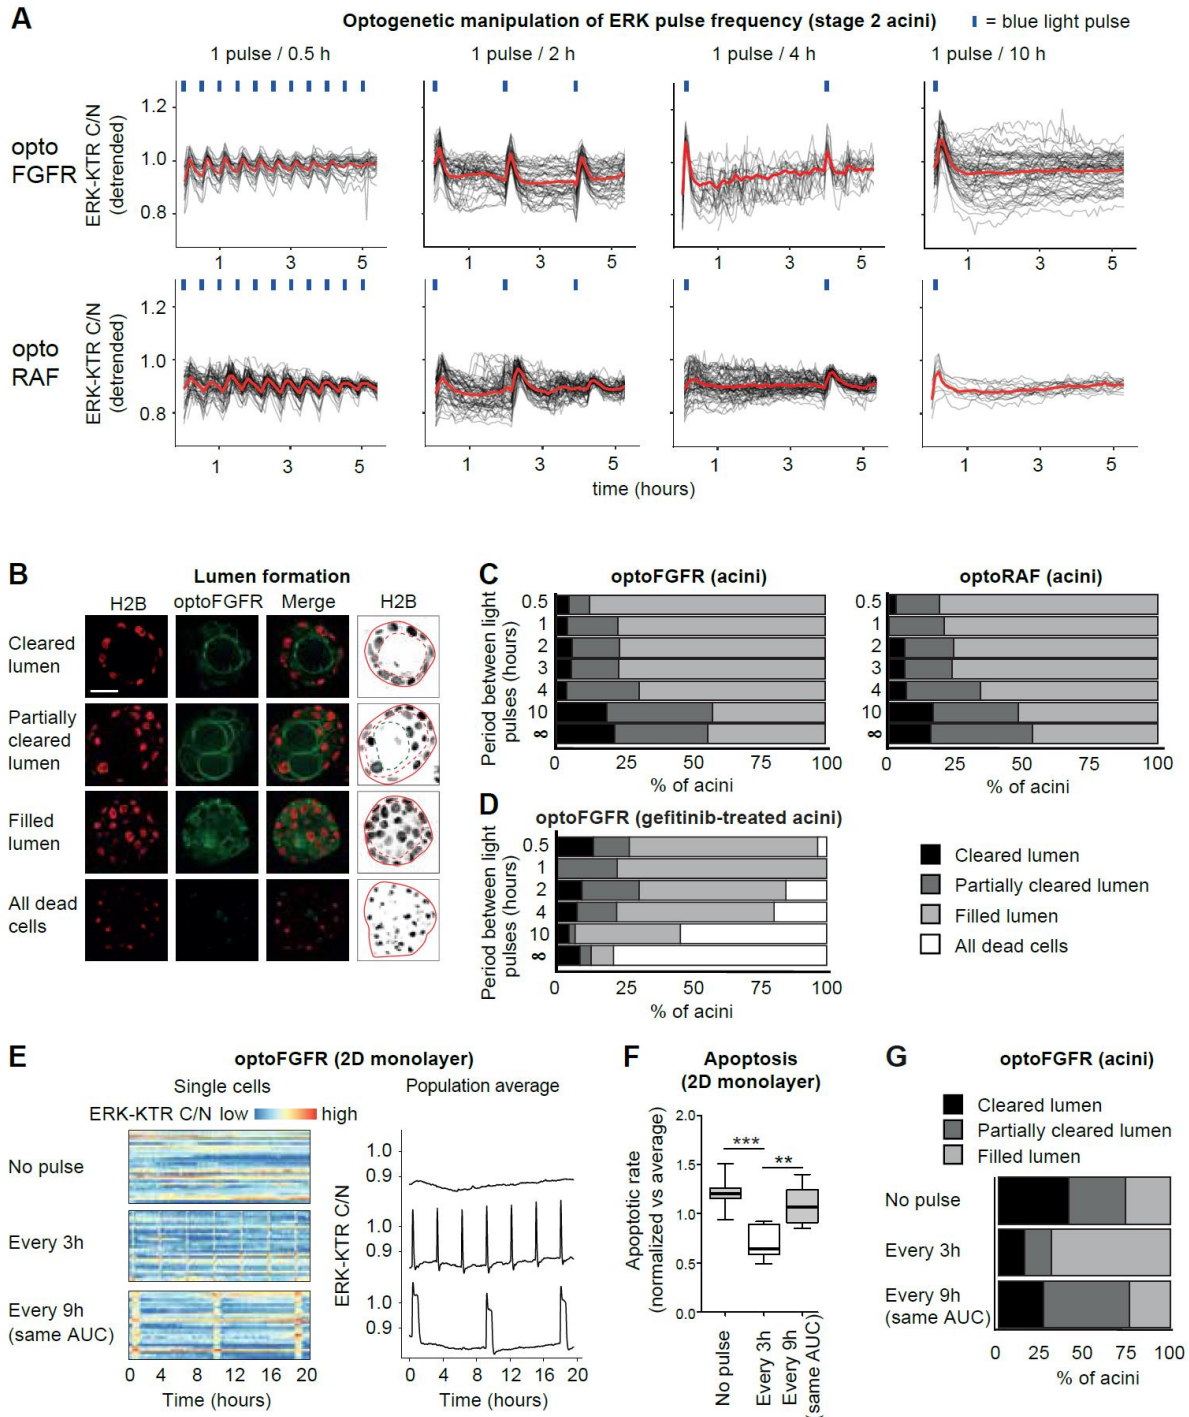

295 **Figure 5 Controlling survival/apoptosis decisions with optogenetic actuators.** (A)  
 296 Overlaid detrended ERK activity trajectories from optoFGFR or optoRAF expressing acinar  
 297 cells stimulated with different blue light pulse frequencies. (B) Colored: Equatorial optical  
 298 sections of acini displaying cleared, partially cleared or filled luminal space or underwent  
 299 complete cell death at stage 4. Black and white: maximal intensity projections of equatorial Z  
 300 planes spanning 12  $\mu\text{m}$ . Acini borders (red lines), luminal space (dashed red lines), and the  
 301 border between the cleared and filled part of the luminal space (dashed green lines) are  
 302 indicated. Scale bar = 20  $\mu\text{m}$ . (C) Percentages of acini displaying cleared, partially cleared or  
 303 filled luminal space at day 14, after 7 days on an LED plate that emitted blue light pulses at  
 304 defined intervals. N = 36 - 72 acini per condition from 2 independent replicates. Pearson's chi-  
 305 squared test. optoFGFR:  $X^2$  (12 degrees of freedom, N = 384) = 78,  $P < 0.001$ . optoRAF:  $X^2$   
 306 (12 degrees of freedom, N = 326) = 32,  $P < 0.005$  (D) Percentages of acini displaying cleared,

307 partially cleared or filled luminal space or complete cell death at day 14, after 7 days in the  
308 presence of gefitinib on an LED plate that emitted blue light pulses at defined intervals. N =  
309 24 - 46 acini per condition.  $X^2$  (15 degrees of freedom, N = 201) = 79,  $P < 0.001$ . (E) MCF10A  
310 cells in monolayer culture were stimulated every 3 hours with blue light pulses or every 9 hours  
311 with the same AUC, achieved with 20 consecutive blue light pulses, and compared with  
312 unstimulated cells. Randomly selected trajectories (left) and whole population average (right).  
313 (F) Distribution of apoptotic rates in 5 biological replicates each one normalized on the  
314 experiment mean. t-test (\*\*,  $P < 0.01$ ; \*\*\*,  $P < 0.001$ ). (G) Percentages of optoFGFR-  
315 expressing acini that displayed cleared, partially cleared or filled luminal space at day 14, after  
316 7 days on an LED plate that emitted either a single blue light pulse every 3 hours, 20  
317 subsequent blue light pulses every 9 hours or no blue light pulses. N = 27-39 acini per  
318 condition.  $X^2$  (4 degrees of freedom, N = 104) = 23,  $P < .001$ .

319 **ERK frequency but not integrated ERK activity regulates the survival fate** Next,  
320 we explored if the frequency of ERK pulses or the total integrated ERK activity over  
321 time controls survival. To test this, we used optoFGFR to induce synthetic ERK  
322 pulses of different widths, that when applied at different frequencies can evoke the  
323 same integrated ERK activity over a specific time period. Since ERK pulses display an  
324 identical shape and promote survival for 4 hours both in serum-deprived 2D  
325 monolayers (Gagliardi et al., 2021) and 3D acini, we first identified light stimulation  
326 schemes capable of inducing ERK pulses of different widths in monolayers. We  
327 applied a series of 1 to 86 successive blue light pulses delivered at 2-minute intervals,  
328 and recorded the resulting ERK dynamics (Figure S4C). We have previously shown  
329 that light stimulation applied at this frequency leads to sustained optoFGFR activity  
330 (Dessauges et al., 2021). The integrated ERK activity (area under the curve = AUC)  
331 displayed a linear relationship with the number of light pulses (Figure S4D). 20 blue  
332 light pulses delivered every 2 minutes led to a single ERK pulse with a three-fold  
333 increase in integrated ERK activity. We then applied 2 distinct optoFGFR stimulation  
334 schemes consisting of 1 AUC equivalent of ERK activity evoked every 3 hours versus  
335 3 AUC equivalents of ERK activity evoked every 9 hours, resulting in the identical  
336 integrated ERK activity over a period of 9 hours (Figure 5E). We found that the first  
337 but not second optogenetic stimulation scheme induced cell survival in serum-  
338 deprived 2D cultures (Figure 5F). We then performed the identical experiment in stage  
339 2 acini by applying the two optogenetic stimulation schemes using LITOS for 7 days.  
340 Quantification of lumen formation efficiency at day 14 revealed increased inner cell  
341 survival when the first, but not the second, optogenetic stimulation scheme was  
342 applied (Figure 5G). These results show that the frequency of ERK pulses rather than  
343 the integrated ERK activity regulates survival.

344 Finally, we also used our optogenetic toolkit to explore a number of scenarios of how  
345 different ERK frequencies in inner/outer cells might be regulated in stage 2 acini.  
346 These results are discussed in the Supplemental Text and Figure S5.

347

### 348 **Oncogenic PI3K signaling increases ERK frequency leading to loss of acinar** 349 **lumen formation**

350 We then explored ERK dynamics in the context of a pathological alteration of acinar  
351 morphogenesis induced by the H1047R mutation in the alpha subunit of PI3K  
352 (PIK3CA), which is frequently mutated in breast cancer (Cancer Genome Atlas

353 Network, 2012). The H1047R PIK3CA mutation leads to absence of lumen in MCF10A  
354 knockin acini (Berglund et al., 2013; Chakrabarty et al., 2010; Chen et al., 2013, Isakoff  
355 et al., 2005; Lauring et al., 2010), as well as ductal hyperplasia in a transgenic mouse  
356 model (Tikoo et al., 2012). H1047R PIK3CA MCF10A knock-in cells have been shown  
357 to display elevated ERK activity using western blot (Gustin et al., 2009), strongly  
358 suggesting the existence of a crosstalk between oncogenic PI3K and MAPK/ERK  
359 signaling. Consistently, we found that H1047R PIK3CA MCF10A knock-in cells  
360 cultured as monolayers displayed higher median ERK frequency than their wild-type  
361 (WT) counterparts (Figure 6A-C), while maintaining similar ERK pulse shape, duration  
362 and amplitude (Figure 6D, S6A,B). The finding of a similar ERK pulse shape in WT  
363 and mutant cells indicates that the PI3K to MAPK crosstalk must occur upstream of  
364 Ras because the MAPK network structure that shapes ERK dynamics is maintained  
365 (Kholodenko et al., 2010). The increased ERK frequency suggests the involvement of  
366 receptor level interactions (Sparta et al., 2015).  
367 To better understand the effect of the PIK3CA H1047R on acinar morphogenesis, we  
368 evaluated proliferation and apoptosis during different stages (Figure 6E-I). Stage 1  
369 mutant acini displayed increased proliferation compared to their WT counterparts, as  
370 evidenced by augmented cell numbers, and geminin quantification (Figure 6E-G).  
371 While remaining slightly higher than in WT acini, proliferation also diminished during  
372 stages 2 - 4, but displayed a small upshoot during stage 4 (Figure 6E,G). In contrast  
373 to the steep apoptosis rise observed starting on day 7 in WT acini, apoptotic rates  
374 remained lower in PIK3CA mutant acini at all stages (Figure 6E,H). Increased  
375 proliferation at stage 1, and decreased apoptosis at stages 3 and 4, thus mostly  
376 contribute to increased cell number and absence of lumen formation in PIK3CA-  
377 mutant acini (Figure 6I).

378 We then evaluated ERK dynamics during the pathological acinar morphogenesis  
379 induced by PIK3CA H1047R. As in monolayers, PIK3CA-mutant acini displayed ERK  
380 pulses like those of WT acini (Figure 7A). Stage 1 rotating PIK3CA-mutant acini  
381 displayed ERK frequencies as high as those observed in their WT counterparts (Figure  
382 7B). However, stage 1 non-rotating PIK3CA-mutant acini did not display the decreased  
383 ERK frequency observed in WT (Figure 7B). Stage 2 PIK3CA-mutant acini displayed  
384 increased ERK frequency compared to WT, as well as prominent ERK waves (Figure  
385 7B-D, Movie S6). However, most likely due to their heterogeneity, we could not  
386 pinpoint a specific feature of ERK waves associated with the increased ERK frequency



387 observed in PIK3CA-mutant versus WT acini. PIK3CA-mutant stage 2 displayed  
388 higher ERK frequencies than WT acini, leading the inner cells of PIK3CA-mutant to  
389 exhibit a similar ERK frequency than the outer cells of WT acini (Figure 7B,C).  
390 Amplitude and duration of ERK pulses were similar for both WT and PIK3CA H1047R  
391 acinar cells at all stages (Figure S6C,D).

392 Pictilisib-mediated PI3K or AZD5363-mediated Akt inhibition decreased ERK  
393 frequency in both WT and mutant acini (Figure 7E). Stimulation of WT acini with  
394 insulin-like growth factor (IGF1), that primarily activates PI3K-Akt signaling (Myers et  
395 al., 1993), also resulted in increased ERK pulse frequency (Figure S7A,B). Gefitinib-  
396 mediated EGFR inhibition abolished ERK pulses in PIK3CA-mutant acini, suggesting  
397 an EGFR-dependent mechanism (Figure S7C). Batimastat-mediated MMP inhibition  
398 in PIK3CA H1047R cells led to reduction of ERK phosphorylation to levels  
399 observed in WT cells, without affecting Akt signaling (Figure S7D). PIK3CA  
400 H1047R MCF10A cells have been shown to exhibit increased expression of  
401 the EGFR-ligand amphiregulin in comparison to WT cells (Young et al., 2015),  
402 possibly explaining the increase in EGFR-dependent ERK frequency. Consistently,  
403 we observed increased amphiregulin expression at mRNA level in PI3K-mutant when  
404 compared with WT cells. Amphiregulin expression levels were decreased  
405 upon pictilisib-mediated inhibition of PI3K activity in PIK3CA mutant cells (Figure  
406 S7E). Together, these results strongly suggest that the PI3K to MAPK/ERK crosstalk  
407 that regulates ERK frequency involves amphiregulin/MMP-activation of EGFR.  
408 Increased survival in PIK3CA H1047R acini might therefore involve increased  
409 ERK frequency through this crosstalk mechanism, in addition to PI3K-Akt signaling.



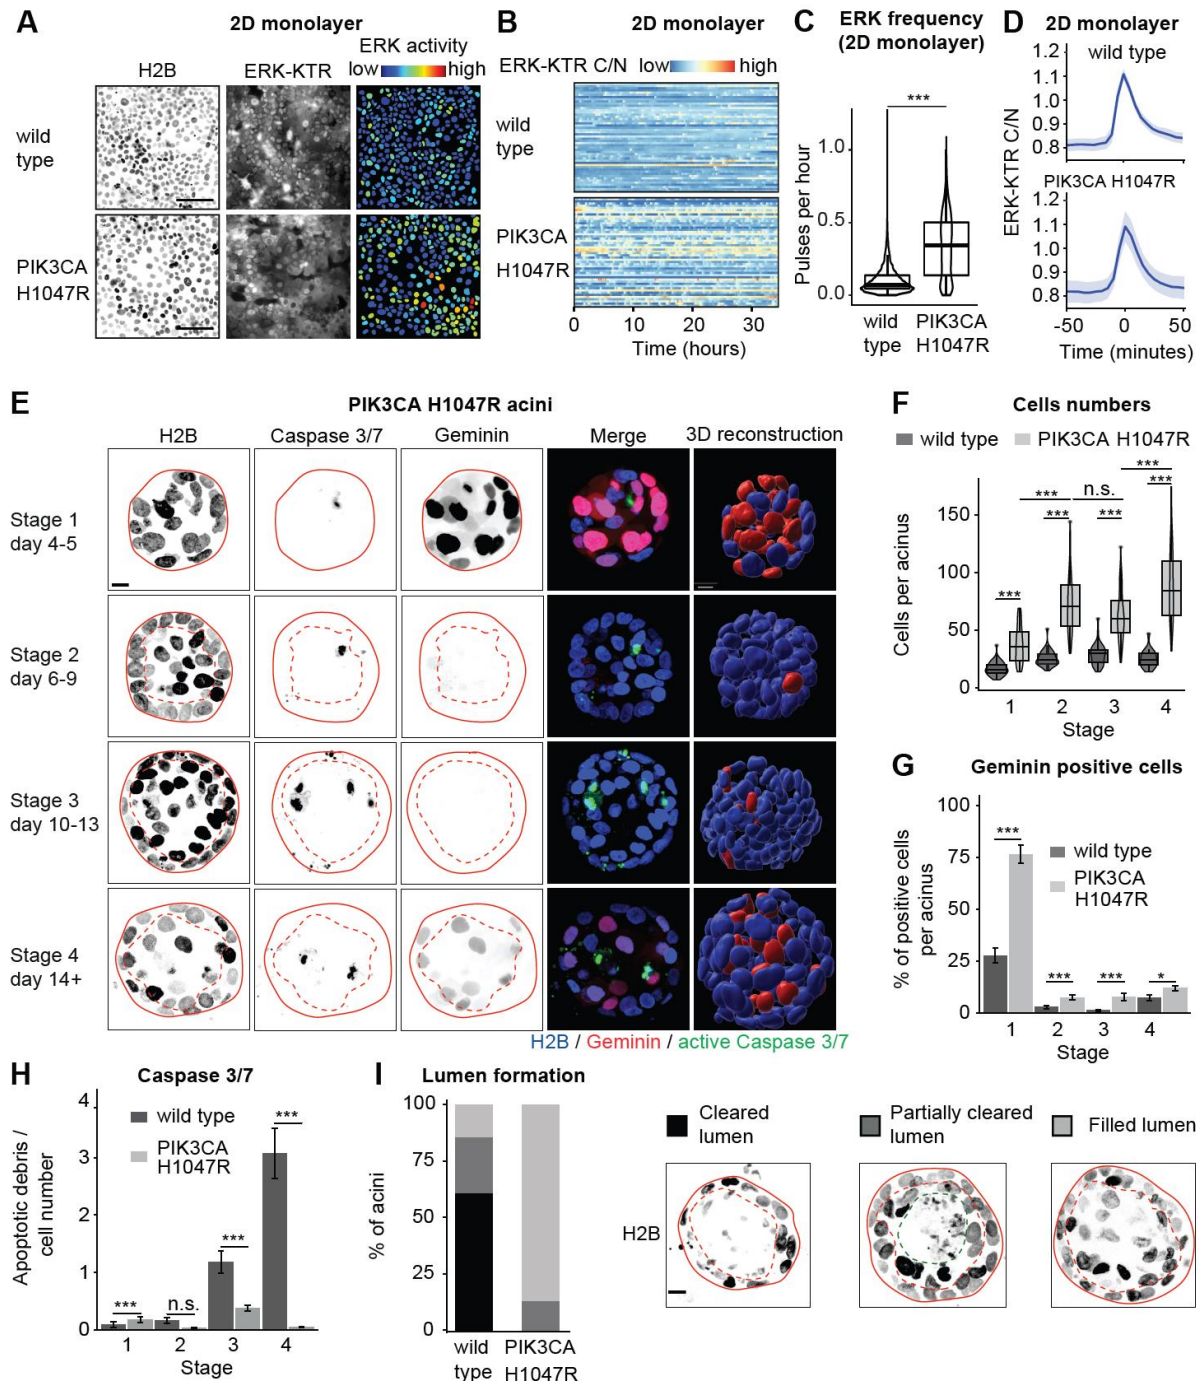

410 **Figure 6 Increased 2D monolayer ERK frequency and altered acinar morphogenesis of**  
 411 **PIK3CA H1047R cells.** (A) Micrographs of WT and PIK3CA H1047R MCF10A 2D monolayers  
 412 expressing fluorescent H2B (left) and ERK-KTR (middle). Right: nuclei of the same cells color-  
 413 coded by ERK-KTR ratio. Scale bar = 100  $\mu$ m. (B) Heatmap of single-cell ERK trajectories in  
 414 WT and PIK3CA H1047R monolayers. (C) ERK frequencies in WT and PIK3CA H1047R  
 415 monolayer cells. (D) Average ERK trajectories from isolated pulses in WT and PIK3CA  
 416 H1047R cells within monolayers. 95% confidence intervals are shown. Time = 0 corresponds  
 417 to maximal amplitude of peaks. (E) Micrographs and 3D reconstructions of H2B, caspase 3/7  
 418 fluorogenic substrate and geminin signals in PIK3CA H1047R acini at different stages.  
 419 Micrographs show maximal intensity projections of equatorial Z planes spanning 12  $\mu$ m. Plain  
 420 lines mark the borders of the acini, dashed lines mark the outer cell layer. Scale bar = 10  $\mu$ m.  
 421 (F) Cell numbers per acinus at the different stages. N = 54 - 60 PIK3CA H1047R acini each.  
 422 (G) Fraction of Geminin positive cells per acinus at different stages. (H) Number of Caspase

423 3/7 apoptotic debris divided by the acinar cell number at different days. (I) Percentages of  
424 acini that either displayed a cleared, partially cleared or filled luminal space at day 14.  
425 Pearson's chi-squared test:  $X^2$  (2 degrees of freedom,  $N = 82$ ) = 50,  $P < 0.001$ . Representative  
426 examples used for classification are shown (maximal intensity projections of equatorial Z  
427 planes spanning 12  $\mu\text{m}$ ). Acini borders (red lines), luminal space (dashed red lines), and the  
428 border between the cleared and filled part of the luminal space (dashed green lines) are  
429 indicated. Scale bar = 10  $\mu\text{m}$ . (F-I) Measurements taken on the same acini. WT acini are the  
430 same as in figure S1, for comparison. (G, H) Error bars represent standard error of the mean.  
431 (C, F, G and H) Wilcoxon tests (n.s.,  $P > 0.05$ ; \*,  $P < 0.05$ ; \*\*,  $P < 0.01$ ; \*\*\*,  $P < 0.001$ ).

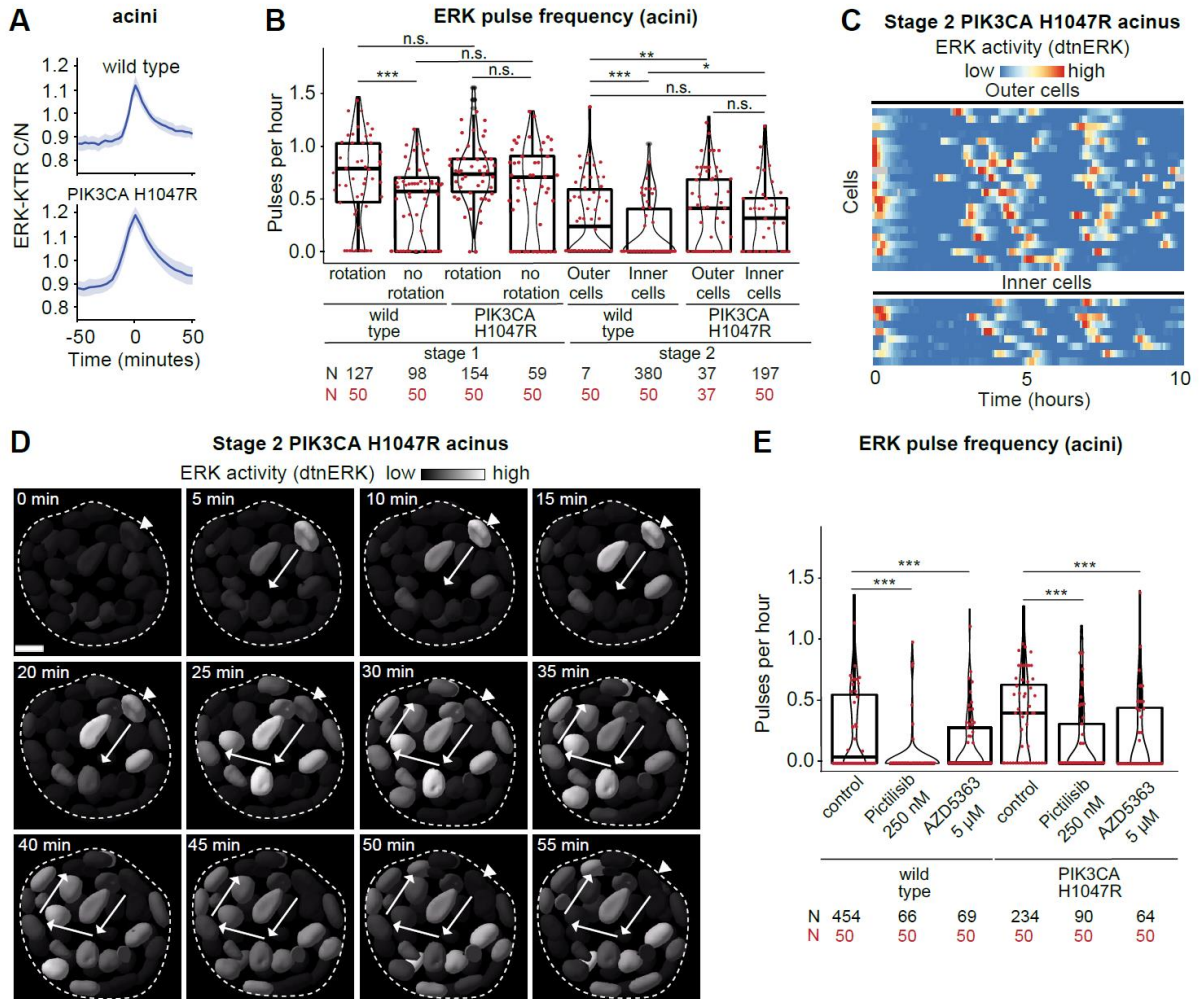

432 **Figure 7 Increased ERK frequency in PIK3CA H1047R mutant acini.** (A) Average ERK  
 433 trajectories from isolated pulses in WT and PIK3CA H1047R cells within acini. 95% confidence  
 434 intervals are shown. Time = 0 corresponds to maximal amplitude of peaks. (B) ERK  
 435 frequencies of WT and PIK3CA H1047R cells at different stages and locations within the  
 436 acinus. Mutant trajectories pooled from 7 (stage 1 rotation), 2 (stage 1 no rotation) and 6 (stage  
 437 2) acini. (C) Heatmap of detrended/normalized single-cell ERK trajectories in outer and inner  
 438 cells of a representative stage 2 PIK3CA H1047R acinus. (D) Representative time-series of  
 439 an ERK wave in a stage 2 PIK3CA H1047R acinus (dashed line) cross section. Nuclei are  
 440 color-coded by ERK activity levels. Arrows show directionality of activation. Arrowhead  
 441 indicates the initiator cell. Scale bar = 10  $\mu$ m. (E) ERK frequencies of WT and PIK3CA H1047R  
 442 cells from control acini and acini treated with 250 nM pictilisib or 5  $\mu$ M AZD5363. (B and E) wt  
 443 control data is the same as in figure 2 and 3, and shown again for comparison. Wilcoxon tests  
 444 (n.s.,  $P > 0.05$ ; \*,  $P < 0.05$ , \*\*,  $P < 0.01$ ; \*\*\*,  $P < 0.001$ ).

## 445 Discussion

446 Recent work in epithelial monolayers have revealed the existence of non-periodic  
447 single-cell ERK pulses, whose frequency controls apoptosis, survival or proliferation  
448 fates (Albeck et al., 2013; Aoki et al., 2013, Gagliardi et al., 2021; Valon et al., 2021).  
449 At the level of a cell population, these ERK pulses can be stochastic when cells are  
450 stimulated with EGF (Albeck et al., 2013), or can be organized as collective ERK  
451 waves during collective cell migration (Aoki et al., 2017; Hino et al., 2020), cancer cell  
452 extrusion (Aikin et al., 2020), or spatial regulation of survival in response to stress  
453 (Gagliardi et al., 2021; Valon et al., 2021). Here we show that similar ERK  
454 pulses/waves coordinate fate decisions during mammary acinar morphogenesis. As  
455 in the cell systems mentioned above, ERK pulses are triggered by MMP-mediated  
456 cleavage of pro-EGF ligands and subsequent activation of EGFR. Downstream of  
457 EGFR, MAPK network properties such as ultrasensitivity and negative feedback  
458 (Huang and Ferrell, 1996, Kholodenko et al., 2010) might allow to translate minute  
459 amounts of MMP-cleaved pro-EGF into clear cut digital ERK pulses. Consistently, the  
460 slightly lower amplitude of spontaneous ERK pulses versus those induced by acute  
461 EGF stimulation suggests that the EGFR/MAPK system functions at the threshold  
462 input to generate digital ERK pulses (Figure 1G). This might allow the  
463 MMP/EGFR/MAPK signaling network to translate small variations in the EGFR input  
464 into frequency-modulated regimes of ERK pulses that can specify proliferation,  
465 survival and apoptosis. Note that exogenous addition of EGF impedes apoptosis-  
466 mediated lumen formation (Gaiko-Shcherbak et al., 2015), further suggesting that  
467 small amounts of EGFR ligands synthesized by the acinus itself are necessary for self-  
468 organisation of its morphogenesis. This MMP/EGFR/MAPK network has also been  
469 shown to produce ERK trigger waves in which activated cells sequentially switch on  
470 ERK pulses in adjacent cells (Aoki et al., 2017; Boocock et al., 2020; Hino et al., 2020).  
471 Our results strongly suggest that the ERK waves observed in stage 2 acini rely on this  
472 mechanism. Thus, a relatively simple signaling network might allow to produce  
473 conserved and sophisticated ERK behaviors in epithelial collectives. This excitable  
474 MMP/EGFR/MAPK network that generates pulsatile ERK activity strongly contrasts  
475 with the oscillatory ERK behavior observed in the segmentation clock in vertebrate  
476 embryos that is regulated on slower timescales by rhythmic transcriptional regulation  
477 of MAPK phosphatases (Hubaud and Pourquié, 2014). We speculate that the pulsatile  
478 MAPK network observed in epithelia provides an opportunity to constantly sense and



479 react to environmental inputs such as growth factors and insults to warrant epithelial  
480 homeostasis during acinar development. This illustrates how the MAPK network can  
481 be differently wired to produce distinct ERK dynamics at different timescales  
482 depending on the developmental context.

483

#### 484 **ERK dynamics regulate collective migration and proliferation in stage 1 acini**

485 We found that stage 1 acini displayed high frequency, asynchronous ERK pulses  
486 during rapid collective cell migration that leads to a global rotation behavior of the  
487 acinus (Figure 2). This rotation behavior has previously been implicated in the  
488 morphogenesis of spherical tissue buds during mammary organogenesis (Fernández  
489 et al., 2021). During migration of 2D epithelial sheets, ERK waves co-ordinate myosin  
490 activity necessary for collective motility, and are shaped by a mechanochemical  
491 feedback from myosin to ERK (Aoki et al., 2017; Boocock et al., 2020; Hino et al.,  
492 2020). Further, ERK also has been shown to control myosin activity in MCF10A acini  
493 single-cell motility (Pearson and Hunter, 2007). We therefore propose that  
494 asynchronous ERK pulses spatially coordinate myosin contractility necessary for this  
495 collective motility behavior. This is consistent with our result that optogenetic  
496 synchronization of ERK pulses immediately leads to decreased collective motility  
497 (Figure 4C-F). The transition to a state of slower motility in late stage 1 acini has been  
498 shown to result from assembly of an endogenous laminin-rich basement membrane  
499 (Wang et al., 2013). We speculate that assembly of this basement membrane might  
500 modify the myosin-ERK mechanochemical feedback loop mentioned above, leading  
501 to decreased ERK frequency and motility, allowing to regulate the transition from  
502 proliferation to quiescence. Assembly of the basement membrane might therefore act  
503 as a checkpoint coordinating ERK frequency-dependent regulation of motility and  
504 transition from proliferation to quiescence. Future experimental/modeling studies will  
505 be necessary to further refine this hypothesis.

506

#### 507 **ERK waves spatially regulate apoptosis and survival fates during stage 2 acinar** 508 **lumen morphogenesis**

509 Our experiments in stage 2 acini suggest that spatial control of different ERK  
510 frequencies regulates survival in outer versus apoptosis fates in inner acinar cells.  
511 Outer cells display a median ERK frequency of one pulse every 4 hours, while inner  
512 cells display lower ERK frequencies (Figure 3A). This is consistent with the ability of

513 one ERK pulse to provide about 4 hours of survival in MCF10A monolayers (Gagliardi  
514 et al., 2021). Using optogenetic control of ERK pulses, we excluded mechanisms such  
515 as differential growth factor receptor sensitivity or refractory time of inner and outer  
516 cells for regulation of different ERK frequencies (Supplementary Text, Figure S5A,B).  
517 Instead, our results suggest a role for collective ERK waves to define the outer and  
518 inner spatial domains of high and low ERK frequency, that respectively specify survival  
519 and apoptosis fates (Figure 3B-I). ERK wave properties such as that they are initiated  
520 mostly in the outer layer, and propagate more efficiently in the outer versus the inner  
521 layer, might dynamically specify the two domains of ERK frequencies on timescale of  
522 hours throughout the 7 days of the acinus cavitation process. While apoptosis is  
523 predominantly responsible for the clearance of luminal cells in acini (Debnath et al.,  
524 2002), we cannot exclude that an alternative mechanism such as autophagy resulting  
525 from metabolic defects in inner cells, which is regulated by EGFR - PI3K signaling  
526 might also contribute to this process (Schafer et al., 2009).

527

### 528 **ERK pulse frequency but not integrated activity regulates survival versus** 529 **apoptosis fates**

530 To formally test if ERK frequency regulates survival/apoptosis fates, we used  
531 optogenetic stimulation of all the cells of acini to causally link ERK frequency with  
532 lumen formation. When used to evoke ERK pulses for up to at least every 4 hours,  
533 both optoFGFR and optoRaf led to loss of lumen formation (Figure 5C). ERK pulses  
534 evoked every 10 hours were not sufficient to rescue apoptosis. These experiments  
535 also functioned when EGFR was completely inhibited (Figure 5D). By optogenetically  
536 varying the ERK pulse width, we also showed that ERK frequency rather than the  
537 integrated ERK activity over time regulates survival versus apoptosis fates, both in  
538 monolayers and in stage 2 acinus lumen formation (Figure 5E-G). Our data therefore  
539 suggests that short ERK pulses are the signaling unit that allows cells in acini to  
540 commit to survival for about 4 hours. This might allow cells to integrate signaling inputs  
541 that fluctuate on timescales of minutes/hours, to dynamically control a morphogenetic  
542 program on timescales of days. Interpretation of a specific ERK frequency into  
543 survival/apoptosis fates might involve the ERK substrate Bcl-2-like protein 11 (Harada  
544 et al., 2004) or ERK-dependent transcriptional control of immediate early genes (IEGs)  
545 (Avraham and Yarden, 2011). IEGs produce transcripts with lifetimes of around 30  
546 minutes, that encode proteins with lifetimes of 1-3 hours. Notably, IEGs include Jun



547 and Fos transcription factors which are important regulators of cell survival (Shaulian  
548 and Karin, 2001). IEG's short lifetime is compatible with the ERK frequency required  
549 for survival. Higher ERK frequencies as observed in stage 1 acini might control  
550 proliferation by regulation of IEGs such as Fra-1 (Gillies et al., 2017).

551

552 **Oncogenic PI3K signaling modulates ERK frequency contributing to aberrant**  
553 **acinar morphogenesis.**

554 Our results show that the breast cancer relevant PIK3CA H1047R mutation increases  
555 ERK frequency, which might contribute at least in part to increased proliferation and  
556 survival leading to larger acini without lumen formation, that phenocopies ductal  
557 hyperplasia observed in mouse models (Tikoo et al., 2012). We show that this  
558 crosstalk from PI3K to ERK signaling feeds into the control of ERK frequency both in  
559 WT and PIK3CA H1047R monolayers and acini (Figure 7, S6-7). This crosstalk also  
560 functions downstream of IGF1, that primarily activates PI3K-Akt signaling (Myers et  
561 al., 1993) (Figure S7A,B), suggesting that it is a conserved feature downstream of  
562 multiple receptor tyrosine kinases. During stage 1, PIK3CA H1047R acini display  
563 similarly high ERK frequencies as in WT acini (Figure 7B). During stage 2, PIK3CA  
564 H1047R acini then still display a substantial decrease in ERK frequency as in WT acini  
565 compared to stage 1 (Figure 7B), which correlates with decreased proliferation (Figure  
566 6E-H). However, ERK frequencies remain slightly higher both in outer and inner cells  
567 in PIK3CA H1047R versus WT acini, correlating with the strong survival phenotype in  
568 inner cells, and absence of lumen formation. These results suggest that the control of  
569 ERK frequency is still subject to some degree of regulation even when the crosstalk  
570 from PIK3CA H1047R is constitutively switched on. Because the ERK pulse shape is  
571 identical in WT and PIK3CA mutant cells, this crosstalk must occur upstream of the  
572 core Raf/MEK/ERK circuit. Consistently, ERK activation is sensitive to both EGFR and  
573 MMP inhibition in PIK3CA H1047R cells (Figure S7C,D). As reported previously  
574 (Young et al., 2015), our data strongly suggests that constitutive PI3K activity in  
575 PIK3CA H1047R cells leads to increased expression of the EGFR ligand amphiregulin  
576 that in turn might increase ERK frequency (Sternlicht et al., 2005) (Figure S7E).  
577 PIK3CA H1047R also has been found to decrease expression of the protein tyrosine  
578 phosphatase receptor type F (PTPRF) (Young et al., 2015), which might further  
579 augment EGFR excitability and thus ERK frequency. Further work is required to  
580 elucidate the specific contributions of PI3K and ERK signaling to control the

581 survival/apoptosis fate decisions and how the PI3K/ERK crosstalk might spatially fine  
582 tune ERK frequency. Our result strongly suggests that oncogenic PI3K signaling-  
583 induced aberrant spatial regulation of ERK frequency contributes to pathological  
584 acinar morphogenesis.

585

## 586 **Conclusion**

587 We provide an initial characterization into how single-cell ERK dynamics control fate  
588 decisions in space and time during the morphogenesis of a simple prototype organ  
589 structure. Future studies are required to mechanistically understand how the different  
590 dynamic signaling states are encoded and spatially organized, and if they provide  
591 robustness against environmental perturbations occurring during development. This  
592 will require the ever-expanding arsenal of optogenetic tools to manipulate specific cells  
593 and evaluate how the cell collective responds. Further questions include how  
594 additional signaling pathways might fine tune this morphogenetic process, and how  
595 the ERK frequency is decoded into transcriptional programs that actuate the different  
596 fates that shape acinus morphogenesis.

## 597 **Material and methods**

598

### 599 **2D cell culture**

600 MCF10A cells were cultured in DMEM/F12 supplemented with 5% horse serum, 20  
601 ng/ml recombinant human EGF (Peprotech), 0.5 µg/ml hydrocortisone (Sigma-  
602 Aldrich/Merck), 10 µg/ml insulin (Sigma-Aldrich/Merck), 200 U/ml penicillin and 200  
603 µg/ml streptomycin. The PIK3CA H1047R knockin cell line (Gustin et al., 2009) was a  
604 gift of Ben Ho Park. We regularly verified the presence of the mutation by sequencing  
605 the corresponding genomic locus. To generate stable cell lines, cells were transfected  
606 with FuGene (Promega) according to the manufacturer's protocol and clones were  
607 selected by antibiotic resistance and image-based screening.

608

### 609 **3D cell culture**

610 For acinus formation, single MCF10A cell suspensions were mixed with 4 volumes of  
611 growth factor-reduced Matrigel (Corning) at 4 °C and spread evenly on the surface of  
612 glass bottom cell culture plates at a concentration of  $1.5 \times 10^4$  cells/cm<sup>2</sup>. Acini were  
613 cultured in DMEM/F12 supplemented with 2% horse serum, 20 ng/ml recombinant  
614 human EGF, 0.5 µg/ml hydrocortisone, 10 µg/ml insulin, 200 U/ml penicillin and 200  
615 µg/ml streptomycin. Horse serum, insulin and EGF were removed after 3 days of  
616 culture. For live imaging, 25 mM Hepes was added to the medium prior to mounting  
617 on the microscope. CellEvent Caspase 3/7 Green Detection Reagent was obtained  
618 from Thermo Fisher Scientific and used according to the manufacturer's protocol.

619

### 620 **Plasmids**

621 ERK-KTR-mTurquoise2 and ERK-KTR-mRuby2 were generated by fusion of the  
622 coding region of ERK-KTR (Regot et al., 2014) with that of mTurquoise2 (Goedhart et  
623 al., 2012) or mRuby2 (Lam et al., 2012). H2B-miRFP703 was generated by fusion of  
624 the coding region of human H2B clustered histone 11 (H2BC11) with that of miRFP703  
625 (Shcherbakova et al., 2016). Geminin-mCherry was generated by fusion of the  
626 ubiquitylation domain of human Geminin (Sakaue-Sawano et al., 2017) to mCherry.  
627 The above mentioned fusion proteins were cloned in the piggyBac vectors pMP-PB,  
628 pSB-HPB (Balasubramanian et al., 2016) (gift of David Hacker, EPFL), or  
629 pPB3.0.Blast, an improved version of pPB generated in our lab.  
630 pPB3.0-PuroCRY2-cRAF-mCitrine-P2A-CIBN-KrasCT, referred to in the manuscript

631 as OptoRAF, was generated in the following way: The CRY2-cRaf sequence was  
632 excised from pCX4puro-CRY2-cRAF (gift from Kazuhiro Aoki, (Aoki et al., 2017))  
633 using EcoRI and NotI. mCitrine was PCR amplified from the optoFGFR plasmid, while  
634 adding NotI and XhoI sites, and digested. Both sequences were ligated into pPB3.0-  
635 Puro, previously digested with EcoRI and XhoI. The GSGP2A-CIBN-KRasCT  
636 sequence (synthesized by GENEWIZ) was digested with BsrGI and AflIII and ligated  
637 into pPB3.0-Puro-CRY2-cRAF-mCitrine.

638 The piggyBac plasmids were co-transfected with a helper plasmid expressing a  
639 hyperactive piggyBac transposase (Yusa et al., 2011).

640 Lyn-cytoFGFR1-PHR-mCit, expressing myristoylated FGFR1 cytoplasmic region  
641 fused with the PHR domain of cryptochrome2 and mCitrine (gift from Won Do Heo  
642 (Addgene plasmid # 59776), (Kim et al., 2014)), referred to in the manuscript as  
643 OptoFGFR, was subcloned in a lentiviral backbone for stable cell line generation.

644

## 645 **Imaging**

646 All acini images were acquired on an epifluorescence Eclipse Ti2 inverted  
647 fluorescence microscope (Nikon) equipped with a CSU-W1 spinning disk confocal  
648 system (Yokogawa) and a Plan Apo VC 60X water immersion objective (NA = 1.2).  
649 For time lapse imaging, laser-based autofocus was used. Images were acquired with  
650 a Prime 95B or a Prime BSI sCMOS camera (both Teledyne Photometrics) at 16-bit  
651 depth. Temperature, CO<sub>2</sub> and humidity were controlled throughout live imaging with a  
652 temperature control system and gas mixer (both Life Imaging Services).

653 All monolayer cell images were acquired on an epifluorescence Eclipse Ti inverted  
654 fluorescence microscope (Nikon) with a Plan Apo 20x air objective (NA = 0.8) or a  
655 Plan Apo 40X air objective (NA = 0.9). Laser-based autofocus was used throughout  
656 imaging. Images were acquired with an Andor Zyla 4.2 plus camera at 16-bit depth.

657 Both microscopes were controlled by NIS elements (Nikon).

658

## 659 **Inhibitors and growth factors**

660 Gefitinib was obtained from Sigma-Aldrich/Merck and used at a concentration of 10  
661  $\mu$ M. Trametinib was obtained from Selleck Chemicals and used at a concentration of  
662 5  $\mu$ M. Batimastat was obtained from MedChem Express and used at a concentration  
663 of 30  $\mu$ M. Pictilisib was obtained from Selleck Chemicals and used at a concentration  
664 of 250 nM. AZD5363 was obtained from Selleck Chemicals and used at a

665 concentration of 5  $\mu$ M. IGF1 was obtained from Peprtech and used at a concentration  
666 of 100 nM.

667

### 668 **Optogenetic experiments**

669 For short term optogenetics experiments performed directly on the microscope, acini  
670 were illuminated with wide field blue light (470 nm LED) at defined time points during  
671 spinning disc time lapse imaging. Acini expressing optoFGF were illuminated for 100  
672 ms at 50% LED intensity. Acini expressing optoRAF were illuminated for 100 ms at  
673 60% LED intensity. The NIS elements JOBS module was used to program the imaging  
674 and stimulation patterns.

675 The 2D monolayer optogenetic experiments were executed by culturing MCF10A  
676 expressing optoFGFR, ERK-KTR-mRuby2 and H2B-miRFP703 as confluent  
677 monolayer on 24 well plates with glass bottom. Optogenetic stimulation was done with  
678 488 nm LED light at 100% light intensity for 100ms and using a 20x air objective. To  
679 generate larger ERK activity pulses, cells were stimulated with trains of 488 nm light  
680 pulses with a 2 min interval. The area under the curve (AUC) of ERK activity was  
681 calculated using the ERK activity levels before and after the ERK pulses to set the  
682 baseline. The correlation function between the number of 488 nm light pulses and  
683 AUC was obtained by linear regression. The effects of different frequencies with same  
684 AUC on apoptosis was measured after 24 hours of time-lapse acquisition and manual  
685 annotation of apoptotic events on the base of morphological alterations of cell nucleus.  
686 For long term optogenetic stimulation with the LITOS system, glass bottom 96-well cell  
687 culture plates with 7-day old acini were fitted on a 32 x 64 RGB LED matrix (Boxtec)  
688 inside a cell culture incubator. The matrix was connected to a custom printed circuit  
689 board with an ESP32 microcontroller. This system was programmed to emit 1-minute  
690 blue light pulses at maximal intensity at defined intervals for 7 days, after which lumen  
691 formation efficiency was assessed. Acini were fixed with 4% paraformaldehyde prior  
692 to imaging.

693

### 694 **Image analysis of 3D acini**

695 The open source LEVERJS software (Cohen, 2014; Wait et al., 2014; Winter et al.,  
696 2016) was used to analyze the 3D time lapse movies. The LEVERJS software was  
697 updated to include improved processing and visualization capabilities. The processing  
698 pipeline began with a GPU-accelerated 3D non-local means denoising algorithm (Wait



699 et al., 2019). After denoising, a new ensemble-based segmentation algorithm was  
700 applied. This ensemble segmentation combined an adaptive thresholding into  
701 foreground/background regions with an anisotropic 3D Laplacian of Gaussian filter  
702 targeted to a specific cell radius to separate touching cells (Winter et al., 2019). The  
703 base segmentation was run at different cell radii and the results were combined using  
704 unsupervised learning techniques from the field of algorithmic information theory  
705 (Cohen et al., 2009). Here, the radii evaluated ranged from 2.5  $\mu\text{m}$  to 4  $\mu\text{m}$  in 0.5  $\mu\text{m}$   
706 steps. These values were set empirically based on expected cell size ranges.  
707 Following segmentation, the cells were tracked using Multitemporal Association  
708 Tracking (Winter et al., 2011); (Winter et al., 2012).

709 Following segmentation and tracking of the image sequences, the ERK-KTR signal  
710 was extracted and processed to a detrended and normalized signal. To extract the  
711 ERK-KTR signal, distance transforms were computed for each segmented image. The  
712 interior distance transform assigned each cell interior voxel a numeric value indicating  
713 its distance starting at the cell boundary and increasing to the centroid. The exterior  
714 distance transform assigned each boundary voxel a numeric value indicating its  
715 distance to the nearest cell-assigned voxel. The exterior distance transform also  
716 provided the identity of the nearest cell-assigned voxel for each background voxel.  
717 The ERK-KTR signal was computed as the ratio of the image values around the center  
718 of the cell to the image values around the boundary of the cell. The center region of  
719 the cell included voxels in the 95<sup>th</sup> percentile of the interior distance transform. For the  
720 boundary region of the cell we included interior voxels within one unit of the boundary  
721 and exterior voxels within three units of the boundary. The resulting ERK-KTR signal  
722 was computed as the ratio of the median voxel value in the outer region to the median  
723 voxel value in the inner region. The extracted ERK-KTR signals for each cell had  
724 different base intensities and showed different amounts of fluctuation. To normalize  
725 this and to allow for quantitative comparison and visual representation with different  
726 cell ERK-KTR expression levels we computed a detrended and normalized ERK-KTR  
727 signal as follows. The signal  $S$  was first detrended by subtracting the median filter  
728 signal,  $S_d = S - \text{median\_filter}(S)$ . The signal was then normalized to the range  $[0,1]$   
729 using  $S_{nd} = S_d / \max(S_d)$ , unless the signal range in the detrended trajectory was below  
730 an empirically set threshold. Inner and outer cells in stage 2 acini were identified  
731 visually based on the 3D reconstructions in LEVERJS.

732 For segmentation and quantification of steady state Z-stacks, CellProfiler 3.1.8  
733 (McQuin et al., 2018) with 3D functionalities was used. Nuclei were identified based  
734 on H2B-miRFP signals. Apoptotic debris were identified using Caspase 3/7 Green  
735 Detection kit signals using adaptive thresholding and watershed segmentation.  
736 Geminin-mCherry intensities were measured within nuclei voxel masks. ERK-KTR  
737 cytosolic/nuclear intensity ratios were generated by measuring median ERK-KTR  
738 intensities in the nuclear area and in a spherical voxel mask 1 pixel around the nuclear  
739 objects. Imaris software (Bitplane) was used for 3D rendering of confocal stacks and  
740 to track and measure motility parameters in Figures 2 and 4.

741

#### 742 **Image analysis of 2D cell cultures**

743 Nuclei of monolayer cells were segmented using Ilastik (Berg et al., 2019) and  
744 CellProfiler 3.0. Ilastik was used for training a random forest classifier on different pixel  
745 features of the H2B-miRFP channel and background pixels. The training data was  
746 generated by manual annotation of 20 - 50 cells. The resulting probability map was  
747 imported into CellProfiler for thresholding and segmentation. Cytosolic ERK-KTR  
748 fluorescence intensities were measured by expansion of the nuclear objects. Cells  
749 were tracked using  $\mu$ -track 2.2.1 (Jaqaman et al., 2008).

750

#### 751 **Data analysis**

752 All analysis and visualization of ERK activity peaks and time series was performed  
753 with custom R/Matlab/Python code.

#### 754 **ERK activity pulse detection**

755 ERK activity peaks were identified and counted by the following steps. 1. Application  
756 of a short median filter to smooth the time series. 2. Application of a long median filter  
757 to produce a bias estimate which was subtracted from the smoothed time series. 3.  
758 Detrended time-series with real peaks were then identified by selecting those with an  
759 activity difference above an empirical threshold. Those were rescaled to [0,1] and a  
760 local maxima detection algorithm was used to identify peaks above an amplitude of  
761 0.1.

#### 762 **Identification of collective events**

763 To identify waves of collective ERK activation we developed a custom code and  
764 implemented it in R. The algorithm works on a binarised signal that is calculated by

765 detrending and normalising ERK-KTR cytosolic/nuclear intensity ratio time series as  
766 described above (Figure S3F,G). The algorithm searches for the first occurrence of  
767 cells with ERK switched on (Figure S3H). If several such cells exist and they are  
768 located within a threshold radius, they initiate the first collective event. A single active  
769 cell can also become a collective event. In the next time point, the algorithm repeats  
770 the search for active cells and compares their distances to cells in the previous frame.  
771 If new active cells are located within the threshold distance to active cells at the  
772 previous time point, they are added to respective collective events. If new active cells  
773 are located outside of the threshold distance, they form new collective events. This  
774 process of growing clusters of collective activity is repeated for all remaining time  
775 points. The resulting statistics include the total number of cells involved in a collective  
776 event, the duration and the average size of an event and the location (inner or outer  
777 layer) of the cells that initiates the event.

778

### 779 **Immunoblotting and qPCR**

780 Cells were plated into 6-well dishes ( $2 \times 10^5$  cells/well) and cultured for 48h. The  
781 resulting cell monolayers were washed twice with room temperature PBS, then  
782 starving medium was added. For immunoblotting 1uL/mL DMSO or 10ug/mL  
783 Batimastat was added together with the starving medium and cells were further  
784 cultured for 72h. Media was removed, monolayers were washed twice with ice-cold  
785 PBS, whole cell lysates were prepared and analyzed by immunoblotting as described  
786 before (Dessauges et al., 2021). Primary antibodies against the following  
787 proteins/epitopes were used: phospho-AKT<sup>Ser473</sup> (cat. # 4058), AKT (cat. # 9272),  
788 phospho-p44/42 MAPK (Erk1/2)<sup>Thr202/Tyr204</sup> (cat. # 4370), p44/42 MAPK (Erk1/2) (cat.  
789 # 4695), all from Cell Signaling Technologies, BioConcept Ltd. Secondary  
790 IRDye680LT- or IRDye800CW-conjugated anti-species specific IgGs were from LI-  
791 COR. For qPCR cells were first starved for 24h, then fresh starving medium containing  
792 1uL/mL DMSO or 2uM and 10uM pictilisib was added and cells were cultured for 24h.  
793 Media was removed, monolayers were washed twice with ice-cold PBS, RNA was  
794 isolated using TRIzol reagent. Reverse transcription was done with the ProtoScript II  
795 reverse transcriptase kit (Bioconcept, M0368L). Real-time qPCR reactions were run  
796 using the MESA Green qPCR MasterMix Plus for SYBR Green assay (Eurogenetec,  
797 RT-SY2X-03+WOU) on the Rotor-Gen Q device (Qiagen). Each sample was tested in  
798 triplicate. Expression of the gene of interest was calculated using the  $2^{-\Delta\Delta C_t}$  method.

799 The sequences of the primer sets used are as follows: AREG, 5' -ACA TTT CCA TTC  
800 TCT TGT CG- 3' (forward), and 5' - ACA TTT CCA TTC TCT TGT CG- 3' (reverse);  
801 FLJ22101, 5' -TTC CCT GTG GCA CTT GAC ATT- 3' (forward), and 5'-CTT TTG CCT  
802 CTG GCA GTA CTC A-3' (reverse).

803

#### 804 **Quantification and statistical analysis**

805 All graphs were assembled and statistics were performed using R or Excel. Box plots  
806 depict the median and the 25th and 75th percentiles; whiskers correspond to minimum  
807 and maximum non-outlier values in Figures 1G, 2D, 3A, 3H, 3I, 5F, 6C, 6F, 7B, 7E,  
808 S1C, S3B, S3C, S3D, S3E, S4B, S6A, S6B, S6C, S6D and S7A. Dot plots show  
809 distribution of 50 randomly selected data points per condition, or all data points if there  
810 are less than 50. Red lines in ERK activity trajectories represent the population  
811 average. The statistical tests used and the significance thresholds are indicated in  
812 each respective legend.

813

#### 814 **Data and code availability**

815 The open-source code for LEVERJS is available at <https://leverjs.net/git>. All 3D  
816 datasets that were analyzed with LEVERJS for this publication can be browsed  
817 interactively at [https://leverjs.net/mcf10a\\_3d](https://leverjs.net/mcf10a_3d).

818

#### 819 **Acknowledgments**

820 The authors are grateful to Ben Ho Park for providing the MCF10A PIK3CA H1047R  
821 knockin MCF10A cells, to Kazuhiro Aoki for the optoRaf construct, and to Won Do Heo  
822 for the optoFGFR construct. This work was supported by grants from the Swiss  
823 National Science Foundation and the Swiss Cancer Research Foundation to Olivier  
824 Pertz and from a Human Frontiers Science Program grant to Olivier Pertz and Andrew  
825 Cohen. We acknowledge support of the Microscopy Imaging Center of the University  
826 of Bern (<https://www.mic.unibe.ch/>).

827

#### 828 **Author contribution**

829 PE, PAG and OP designed the study. PE, PAG and AF performed experiments and analyzed  
830 data. MD and M-AJ analyzed data. CD provided expertise with the optogenetic tools. TH

831 provided expertise with LITOS. ARC performed image analysis using LEVERJS. PE, PAG and  
832 OP wrote the paper.

833

### 834 **Conflict of interest**

835 The authors declare that they have no conflict of interest.

836

837

### 838 **References**

839 Aikin, T.J., Peterson, A.F., Pokrass, M.J., Clark, H.R., and Regot, S. (2020). MAPK activity  
840 dynamics regulate non-cell autonomous effects of oncogene expression. *ELife* 9.

841 Albeck, J.G., Mills, G.B., and Brugge, J.S. (2013). Frequency-modulated pulses of ERK  
842 activity transmit quantitative proliferation signals. *Mol. Cell* 49, 249–261.

843 Anderson, L.R., Sutherland, R.L., and Butt, A.J. (2010). BAG-1 overexpression attenuates  
844 luminal apoptosis in MCF-10A mammary epithelial cells through enhanced RAF-1 activation.  
845 *Oncogene* 29, 527–538.

846 Aoki, K., Kumagai, Y., Sakurai, A., Komatsu, N., Fujita, Y., Shionyu, C., and Matsuda, M.  
847 (2013). Stochastic ERK activation induced by noise and cell-to-cell propagation regulates cell  
848 density-dependent proliferation. *Mol. Cell* 52, 529–540.

849 Aoki, K., Kondo, Y., Naoki, H., Hiratsuka, T., Itoh, R.E., and Matsuda, M. (2017). Propagating  
850 wave of ERK activation orients collective cell migration. *Dev. Cell* 43, 305-317.e5.

851 Avraham, R., and Yarden, Y. (2011). Feedback regulation of EGFR signalling: decision  
852 making by early and delayed loops. *Nat. Rev. Mol. Cell Biol.* 12, 104–117.

853 Balasubramanian, S., Wurm, F.M., and Hacker, D.L. (2016). Multigene expression in stable  
854 CHO cell pools generated with the piggyBac transposon system. *Biotechnol. Prog.* 32, 1308–  
855 1317.

856 Berglund, F.M., Weerasinghe, N.R., Davidson, L., Lim, J.C., Eickholt, B.J., and Leslie, N.R.  
857 (2013). Disruption of epithelial architecture caused by loss of PTEN or by oncogenic mutant  
858 p110 $\alpha$ /PIK3CA but not by HER2 or mutant AKT1. *Oncogene* 32, 4417–4426.

859 Berg, S., Kutra, D., Kroeger, T., Straehle, C.N., Kausler, B.X., Haubold, C., Schiegg, M., Ales,  
860 J., Beier, T., Rudy, M., et al. (2019). ilastik: interactive machine learning for (bio)image  
861 analysis. *Nat. Methods* 16, 1226–1232.

862 Boocock, D., Hino, N., Ruzickova, N., Hirashima, T., and Hannezo, E. (2020). Theory of  
863 mechanochemical patterning and optimal migration in cell monolayers. *Nat. Phys.*



- 864 Cancer Genome Atlas Network (2012). Comprehensive molecular portraits of human breast  
865 tumours. *Nature* *490*, 61–70.
- 866 Chakrabarty, A., Rexer, B.N., Wang, S.E., Cook, R.S., Engelman, J.A., and Arteaga, C.L.  
867 (2010). H1047R phosphatidylinositol 3-kinase mutant enhances HER2-mediated  
868 transformation by heregulin production and activation of HER3. *Oncogene* *29*, 5193–5203.
- 869 Chen, N., Eritja, N., Lock, R., and Debnath, J. (2013). Autophagy restricts proliferation driven  
870 by oncogenic phosphatidylinositol 3-kinase in three-dimensional culture. *Oncogene* *32*, 2543–  
871 2554.
- 872 Ciarloni, L., Mallepell, S., and Briskin, C. (2007). Amphiregulin is an essential mediator of  
873 estrogen receptor alpha function in mammary gland development. *Proc Natl Acad Sci USA*  
874 *104*, 5455–5460.
- 875 Cohen, A.R. (2014). Extracting meaning from biological imaging data. *Mol. Biol. Cell* *25*, 3470–  
876 3473.
- 877 Cohen, A.R., Bjornsson, C.S., Temple, S., Banker, G., and Roysam, B. (2009). Automatic  
878 summarization of changes in biological image sequences using algorithmic information theory.  
879 *IEEE Trans. Pattern Anal. Mach. Intell.* *31*, 1386–1403.
- 880 Debnath, J., Mills, K.R., Collins, N.L., Reginato, M.J., Muthuswamy, S.K., and Brugge, J.S.  
881 (2002). The role of apoptosis in creating and maintaining luminal space within normal and  
882 oncogene-expressing mammary acini. *Cell* *111*, 29–40.
- 883 Debnath, J., Muthuswamy, S.K., and Brugge, J.S. (2003). Morphogenesis and oncogenesis  
884 of MCF-10A mammary epithelial acini grown in three-dimensional basement membrane  
885 cultures. *Methods* *30*, 256–268.
- 886 Dessauges, C., Mikelson, J., Dobrzynski, M., Jacques, M.-A., Frismantiene, A., Gagliardi,  
887 P.A., Khammash, M., and Pertz, O. (2021). Optogenetic actuator/biosensor circuits for large-  
888 scale interrogation of ERK dynamics identify sources of MAPK signaling robustness. *BioRxiv*.
- 889 Du, W.W., Fang, L., Li, M., Yang, X., Liang, Y., Peng, C., Qian, W., O'Malley, Y.Q., Askeland,  
890 R.W., Sugg, S.L., et al. (2013). MicroRNA miR-24 enhances tumor invasion and metastasis  
891 by targeting PTPN9 and PTPRF to promote EGF signaling. *J. Cell Sci.* *126*, 1440–1453.
- 892 Fernández, P.A., Buchmann, B., Goychuk, A., Engelbrecht, L.K., Raich, M.K., Scheel, C.H.,  
893 Frey, E., and Bausch, A.R. (2021). Surface-tension-induced budding drives alveologenesis in  
894 human mammary gland organoids. *Nat. Phys.* *17*, 1130–1136.
- 895 Finlay, D., Healy, V., Furlong, F., O'Connell, F.C., Keon, N.K., and Martin, F. (2000). MAP  
896 kinase pathway signalling is essential for extracellular matrix determined mammary epithelial  
897 cell survival. *Cell Death Differ.* *7*, 302–313.

- 898 Gagliardi, P.A., Dobrzyński, M., Jacques, M.-A., Dessauges, C., Ender, P., Blum, Y., Hughes,  
899 R.M., Cohen, A.R., and Pertz, O. (2021). Collective ERK/Akt activity waves orchestrate  
900 epithelial homeostasis by driving apoptosis-induced survival. *Dev. Cell* 56, 1712-1726.e6.
- 901 Gaiko-Shcherbak, A., Fabris, G., Dreissen, G., Merkel, R., Hoffmann, B., and Noetzel, E.  
902 (2015). The acinar cage: basement membranes determine molecule exchange and  
903 mechanical stability of human breast cell acini. *PLoS ONE* 10, e0145174.  
904
- 905 Gillies, T.E., Pargett, M., Minguet, M., Davies, A.E., and Albeck, J.G. (2017). Linear Integration  
906 of ERK Activity Predominates over Persistence Detection in Fra-1 Regulation. *Cell Syst.* 5,  
907 549-563.e5.
- 908 Goedhart, J., von Stetten, D., Noirclerc-Savoye, M., Lelimosin, M., Joosen, L., Hink, M.A.,  
909 van Weeren, L., Gadella, T.W.J., and Royant, A. (2012). Structure-guided evolution of cyan  
910 fluorescent proteins towards a quantum yield of 93%. *Nat. Commun.* 3, 751.
- 911 Goglia, A.G., Wilson, M.Z., Jena, S.G., Silbert, J., Basta, L.P., Devenport, D., and Toettcher,  
912 J.E. (2020). A Live-Cell Screen for Altered Erk Dynamics Reveals Principles of Proliferative  
913 Control. *Cell Syst.* 10, 240-253.e6.
- 914 Gustin, J.P., Karakas, B., Weiss, M.B., Abukhdeir, A.M., Lauring, J., Garay, J.P., Cosgrove,  
915 D., Tamaki, A., Konishi, H., Konishi, Y., et al. (2009). Knockin of mutant PIK3CA activates  
916 multiple oncogenic pathways. *Proc Natl Acad Sci USA* 106, 2835–2840.
- 917 Harada, H., Quearry, B., Ruiz-Vela, A., and Korsmeyer, S.J. (2004). Survival factor-induced  
918 extracellular signal-regulated kinase phosphorylates BIM, inhibiting its association with BAX  
919 and proapoptotic activity. *Proc Natl Acad Sci USA* 101, 15313–15317.
- 920 Hino, N., Rossetti, L., Marín-Llauradó, A., Aoki, K., Trepát, X., Matsuda, M., and Hirashima,  
921 T. (2020). ERK-Mediated Mechanochemical Waves Direct Collective Cell Polarization. *Dev.*  
922 *Cell* 53, 646-660.e8.
- 923 Hiratsuka, T., Fujita, Y., Naoki, H., Aoki, K., Kamioka, Y., and Matsuda, M. (2015). Intercellular  
924 propagation of extracellular signal-regulated kinase activation revealed by in vivo imaging of  
925 mouse skin. *ELife* 4, e05178.
- 926 Höhener, T.C., Landolt, A., Dessauges, C., Gagliardi, P.A., and Pertz, O. (2022). LITOS - a  
927 versatile LED illumination tool for optogenetic stimulation. *BioRxiv*.  
928
- 929 Huang, C.Y., and Ferrell, J.E. (1996). Ultrasensitivity in the mitogen-activated protein kinase  
930 cascade. *Proc Natl Acad Sci USA* 93, 10078–10083.

- 931 Hubaud, A., and Pourquié, O. (2014). Signalling dynamics in vertebrate segmentation. *Nat.*  
932 *Rev. Mol. Cell Biol.* *15*, 709–721.
- 933 Huebner, R.J., Neumann, N.M., and Ewald, A.J. (2016). Mammary epithelial tubes elongate  
934 through MAPK-dependent coordination of cell migration. *Development* *143*, 983–993.
- 935 Inman, J.L., Robertson, C., Mott, J.D., and Bissell, M.J. (2015). Mammary gland development:  
936 cell fate specification, stem cells and the microenvironment. *Development* *142*, 1028–1042.
- 937 Isakoff, S.J., Engelman, J.A., Irie, H.Y., Luo, J., Brachmann, S.M., Pearline, R.V., Cantley,  
938 L.C., and Brugge, J.S. (2005). Breast cancer-associated PIK3CA mutations are oncogenic in  
939 mammary epithelial cells. *Cancer Res.* *65*, 10992–11000.
- 940 Jaqaman, K., Loerke, D., Mettlen, M., Kuwata, H., Grinstein, S., Schmid, S.L., and Danuser,  
941 G. (2008). Robust single-particle tracking in live-cell time-lapse sequences. *Nat. Methods* *5*,  
942 695–702.
- 943 Kholodenko, B.N., Hancock, J.F., and Kolch, W. (2010). Signalling ballet in space and time.  
944 *Nat. Rev. Mol. Cell Biol.* *11*, 414–426.
- 945 Kim, N., Kim, J.M., Lee, M., Kim, C.Y., Chang, K.-Y., and Heo, W.D. (2014). Spatiotemporal  
946 control of fibroblast growth factor receptor signals by blue light. *Chem. Biol.* *21*, 903–912.
- 947 Lam, A.J., St-Pierre, F., Gong, Y., Marshall, J.D., Cranfill, P.J., Baird, M.A., McKeown, M.R.,  
948 Wiedenmann, J., Davidson, M.W., Schnitzer, M.J., et al. (2012). Improving FRET dynamic  
949 range with bright green and red fluorescent proteins. *Nat. Methods* *9*, 1005–1012.
- 950 Lauring, J., Cosgrove, D.P., Fontana, S., Gustin, J.P., Konishi, H., Abukhdeir, A.M., Garay,  
951 J.P., Mohseni, M., Wang, G.M., Higgins, M.J., et al. (2010). Knock in of the AKT1 E17K  
952 mutation in human breast epithelial cells does not recapitulate oncogenic PIK3CA mutations.  
953 *Oncogene* *29*, 2337–2345.
- 954 Lavoie, H., Gagnon, J., and Therrien, M. (2020). ERK signalling: a master regulator of cell  
955 behaviour, life and fate. *Nat. Rev. Mol. Cell Biol.* *21*, 607–632.
- 956 Liu, J.S., Farlow, J.T., Paulson, A.K., Labarge, M.A., and Gartner, Z.J. (2012). Programmed  
957 cell-to-cell variability in Ras activity triggers emergent behaviors during mammary epithelial  
958 morphogenesis. *Cell Rep.* *2*, 1461–1470.
- 959 Mailleux, A.A., Overholtzer, M., Schmelzle, T., Bouillet, P., Strasser, A., and Brugge, J.S.  
960 (2007). BIM regulates apoptosis during mammary ductal morphogenesis, and its absence  
961 reveals alternative cell death mechanisms. *Dev. Cell* *12*, 221–234.
- 962 McQuin, C., Goodman, A., Chernyshev, V., Kametsky, L., Cimini, B.A., Karhohs, K.W., Doan,  
963 M., Ding, L., Rafelski, S.M., Thirstrup, D., et al. (2018). CellProfiler 3.0: Next-generation image

- 964 processing for biology. *PLoS Biol.* 16, e2005970.
- 965 Myers, M.G., Sun, X.J., Cheatham, B., Jachna, B.R., Glasheen, E.M., Backer, J.M., and White,  
966 M.F. (1993). IRS-1 is a common element in insulin and insulin-like growth factor-I signaling to  
967 the phosphatidylinositol 3'-kinase. *Endocrinology* 132, 1421–1430.
- 968 Paine, I.S., and Lewis, M.T. (2017). The Terminal End Bud: the Little Engine that Could. *J.*  
969 *Mammary Gland Biol. Neoplasia* 22, 93–108.
- 970 Patterson, K.I., Brummer, T., O'Brien, P.M., and Daly, R.J. (2009). Dual-specificity  
971 phosphatases: critical regulators with diverse cellular targets. *Biochem. J.* 418, 475–489.
- 972 Pearson, G.W., and Hunter, T. (2007). Real-time imaging reveals that noninvasive mammary  
973 epithelial acini can contain motile cells. *J. Cell Biol.* 179, 1555–1567.
- 974 Reginato, M.J., Mills, K.R., Becker, E.B.E., Lynch, D.K., Bonni, A., Muthuswamy, S.K., and  
975 Brugge, J.S. (2005). Bim regulation of lumen formation in cultured mammary epithelial acini is  
976 targeted by oncogenes. *Mol. Cell. Biol.* 25, 4591–4601.
- 977 Regot, S., Hughey, J.J., Bajar, B.T., Carrasco, S., and Covert, M.W. (2014). High-sensitivity  
978 measurements of multiple kinase activities in live single cells. *Cell* 157, 1724–1734.
- 979 Sakaue-Sawano, A., Yo, M., Komatsu, N., Hiratsuka, T., Kogure, T., Hoshida, T., Goshima,  
980 N., Matsuda, M., Miyoshi, H., and Miyawaki, A. (2017). Genetically encoded tools for optical  
981 dissection of the mammalian cell cycle. *Mol. Cell* 68, 626-640.e5.
- 982 Schafer, Z.T., Grassian, A.R., Song, L., Jiang, Z., Gerhart-Hines, Z., Irie, H.Y., Gao, S.,  
983 Puigserver, P., and Brugge, J.S. (2009). Antioxidant and oncogene rescue of metabolic  
984 defects caused by loss of matrix attachment. *Nature* 461, 109–113.
- 985 Sebastian, J., Richards, R.G., Walker, M.P., Wiesen, J.F., Werb, Z., Derynck, R., Hom, Y.K.,  
986 Cunha, G.R., and DiAugustine, R.P. (1998). Activation and function of the epidermal growth  
987 factor receptor and erbB-2 during mammary gland morphogenesis. *Cell Growth Differ.* 9, 777–  
988 785.
- 989 Shaulian, E., and Karin, M. (2001). AP-1 in cell proliferation and survival. *Oncogene* 20, 2390–  
990 2400.
- 991 Shcherbakova, D.M., Balaban, M., Emelyanov, A.V., Brenowitz, M., Guo, P., and Verkhusha,  
992 V.V. (2016). Bright monomeric near-infrared fluorescent proteins as tags and biosensors for  
993 multiscale imaging. *Nat. Commun.* 7, 12405.
- 994 Sparta, B., Pargett, M., Minguet, M., Distor, K., Bell, G., and Albeck, J.G. (2015). Receptor  
995 Level Mechanisms Are Required for Epidermal Growth Factor (EGF)-stimulated Extracellular  
996 Signal-regulated Kinase (ERK) Activity Pulses. *J. Biol. Chem.* 290, 24784–24792.

- 997 Sternlicht, M.D., Sunnarborg, S.W., Kouros-Mehr, H., Yu, Y., Lee, D.C., and Werb, Z. (2005).  
998 Mammary ductal morphogenesis requires paracrine activation of stromal EGFR via ADAM17-  
999 dependent shedding of epithelial amphiregulin. *Development* 132, 3923–3933.
- 1000 Tikoo, A., Roh, V., Montgomery, K.G., Ivetac, I., Waring, P., Pelzer, R., Hare, L., Shackleton,  
1001 M., Humbert, P., and Phillips, W.A. (2012). Physiological levels of Pik3ca(H1047R) mutation  
1002 in the mouse mammary gland results in ductal hyperplasia and formation of ER $\alpha$ -positive  
1003 tumors. *PLoS ONE* 7, e36924.
- 1004 Valon, L., Davidović, A., Levillayer, F., Villars, A., Chouly, M., Cerqueira-Campos, F., and  
1005 Levayer, R. (2021). Robustness of epithelial sealing is an emerging property of local ERK  
1006 feedback driven by cell elimination. *Dev. Cell* 56, 1700-1711.e8.
- 1007 Wait, E., Winter, M., Bjornsson, C., Kokovay, E., Wang, Y., Goderie, S., Temple, S., and  
1008 Cohen, A.R. (2014). Visualization and correction of automated segmentation, tracking and  
1009 lineaging from 5-D stem cell image sequences. *BMC Bioinformatics* 15, 328.
- 1010 Wait, E., Winter, M., and Cohen, A.R. (2019). Hydra image processor: 5-D GPU image  
1011 analysis library with MATLAB and python wrappers. *Bioinformatics* 35, 5393–5395.
- 1012 Wang, H., Lacoche, S., Huang, L., Xue, B., and Muthuswamy, S.K. (2013). Rotational motion  
1013 during three-dimensional morphogenesis of mammary epithelial acini relates to laminin matrix  
1014 assembly. *Proc Natl Acad Sci USA* 110, 163–168.
- 1015 Winter, M.R., Fang, C., Banker, G., Roysam, B., and Cohen, A.R. (2012). Axonal transport  
1016 analysis using Multitemporal Association Tracking. *Int. J. Comput. Biol. Drug Des.* 5, 35–48.
- 1017 Winter, M., Wait, E., Roysam, B., Goderie, S.K., Ali, R.A.N., Kokovay, E., Temple, S., and  
1018 Cohen, A.R. (2011). Vertebrate neural stem cell segmentation, tracking and lineaging with  
1019 validation and editing. *Nat. Protoc.* 6, 1942–1952.
- 1020 Winter, M., Mankowski, W., Wait, E., Temple, S., and Cohen, A.R. (2016). LEVER: software  
1021 tools for segmentation, tracking and lineaging of proliferating cells. *Bioinformatics* 32, 3530–  
1022 3531.
- 1023 Winter, M., Mankowski, W., Wait, E., De La Hoz, E.C., Aguinaldo, A., and Cohen, A.R. (2019).  
1024 Separating touching cells using pixel replicated elliptical shape models. *IEEE Trans. Med.*  
1025 *Imaging* 38, 883–893.
- 1026 Young, C.D., Zimmerman, L.J., Hoshino, D., Formisano, L., Hanker, A.B., Gatza, M.L.,  
1027 Morrison, M.M., Moore, P.D., Whitwell, C.A., Dave, B., et al. (2015). Activating PIK3CA  
1028 Mutations Induce an Epidermal Growth Factor Receptor (EGFR)/Extracellular Signal-  
1029 regulated Kinase (ERK) Paracrine Signaling Axis in Basal-like Breast Cancer. *Mol. Cell.*  
1030 *Proteomics* 14, 1959–1976.

- 1031 Yusa, K., Zhou, L., Li, M.A., Bradley, A., and Craig, N.L. (2011). A hyperactive piggyBac  
1032 transposase for mammalian applications. *Proc Natl Acad Sci USA* 108, 1531–1536.
